Short term colour vision plasticity on the reef: Changes in opsin expression under varying light conditions differ between ecologically distinct reef fish species

### **Authors with initials**

Martin Luehrmann (ML) <sup>\*1</sup>, Sara M. Stieb (SMS) <sup>\*1</sup>, Karen L. Carleton (KLC) <sup>2</sup>, Alisa Pietzker (AP) <sup>1</sup>, Karen L. Cheney (KLC) <sup>1,3</sup>, N. Justin Marshall (JM) <sup>1</sup>

<sup>\*</sup>ML and SMS contributed equally to this work.

<sup>1</sup>Queensland Brain Institute, The University of Queensland, Sensory Neurobiology Group, 4072, Brisbane, QLD, Australia

<sup>2</sup>Department of Biology, The University of Maryland, College Park, MD, 20742, USA

<sup>3</sup>School of Biological Sciences, The University of Queensland, 4072, Brisbane, QLD, Australia

### **Corresponding Authors**

Martin Luehrmann & Sara Mae Stieb

Address: Sensory Neurobiology Group

Queensland Brain Institute

University of Queensland

Brisbane | QLD 4072 | Australia

Fax number: +61 (0)7 33654522

Email: m.luehrmann@uq.edu.au

s.stieb@uq.edu.au

**Key Words:** visual ecology, diurnal/nocturnal feeders, phenotypic variation, adaptation, teleost, spectral tuning

### **Summary statement**

Opsin expression in adult specimens of three reef fish species, belonging to two ecologically distinct families, show different adaptive mechanisms to changes in available environmental light.

### **Abstract:**

Vision mediates important behavioural tasks such as mate choice, escape from predators and foraging. In fish, photoreceptors are generally tuned to specific visual tasks and/or to their light environment according to depth or water colour to ensure optimal performance. Evolutionary mechanisms acting on opsin genes, the protein component of the photopigment, can influence the spectral sensitivity of photoreceptors. Opsin genes are known to respond to environmental conditions on a number of time scales including shorter time frames due to seasonal variation, or through longer term evolutionary tuning. There is also evidence for ‘on-the-fly’ adaptations in adult fish in response to rapidly changing environmental conditions, however, results are contradictory. Here we investigated the ability of three reef fish species that belong to two ecologically distinct families, Yellow-striped cardinalfish, *Ostorhinchus cyanosoma*, Ambon damselfish, *Pomacentrus amboinensis*, and Lemon damselfish, *Pomacentrus moluccensis*, to alter opsin-gene expression as an adaptation to short-term (weeks to months) changes of environmental light conditions, and attempted to characterize the underlying expression regulation principles. We report the ability for all species to alter opsin gene expression within months and even a few weeks, suggesting that opsin expression in adult reef fish is not static. Furthermore, we found that opsin expression changes in single cones generally occurred more rapidly than in double cones, and identified different responses of RH2 opsin gene expression between the ecologically distinct reef fish families. Quantum catch correlation analysis suggested different regulation mechanisms for opsin expression dependent on gene class.

## Introduction

Detection of visual cues is often critical for behavioural tasks such as mate choice, escape from predators or foraging (Detto, 2007; Foote et al., 2004; Miyagi et al., 2012; Rick et al., 2006; Sandkam et al., 2015; Stuart-Fox et al., 2003). Therefore, tuning of photoreceptor spectral sensitivities to specific visual tasks and/or parts of the light spectrum relevant for such behaviours may be important for maintaining optimal performance (Price, 2017). This is particularly evident in fish, which have dispersed and adapted to habitats profoundly different in their light environment, including freshwater lakes and rivers, marine coastal reefs, pelagic zones, and the deep sea. Considering the light conditions in these environments, fish visual systems have adapted to the overall environmental illumination of their habitat (Cronin et al., 2014; Lythgoe, 1979). However, it may be necessary for fish to adjust their visual system in adaptation to changes in seasonal light regime (Loew and McFarland, 1990; McFarland, 1990), microhabitat differences (Marshall et al., 2003), depth (Jerlov, 1977; Loew and McFarland, 1990; McFarland, 1990) or activity period (Loew and McFarland, 1990). Spectral sensitivity tuning in fish can be facilitated by various mechanisms, including structural changes, such as optical filtering of specific wavelengths (Siebeck and Marshall, 2001), or variation of photoreceptor size, number and distribution (de Busserolles et al., 2014; Taylor et al., 2015; Wagner and Kröger, 2005); or physiological changes to the properties of the light absorbing photopigments contained in the photoreceptors (Bowmaker, 2008).

The wavelength of maximum absorbance ( $\lambda_{\max}$ ) of each photoreceptor depends primarily on two components of the visual pigment: a vitamin A-derived light absorbing chromophore [A1 or A2 (Toyama et al., 2008; Yokoyama and Yokoyama, 1996)], and the opsin, a trans-membrane protein that is covalently bound to the chromophore (Hunt et al., 2014). Visual opsin genes in vertebrates are classified according to their photoreceptor-specificity and wavelength-dependent spectral sensitivity into one rod opsin (rhodopsin, RH1) used for dim-light vision, and five classes of cone opsins used for colour vision: SWS1 (short wavelength sensitive 1, ultraviolet), SWS2 (short wavelength sensitive 2, violet/blue), RH2B (medium wavelength sensitive 2B, blue-green), RH2A

(medium wavelength sensitive 2A, green), and LWS (long wavelength sensitive, yellow-red) (Cronin et al., 2014; Yokoyama, 2008).

Various genetic mechanisms affecting the sequence structure and repertoire of opsin genes (for review see Bowmaker, 2008; Carleton et al., 2016), the type of chromophore used (A1 or A2) and differences in qualitative and/or quantitative expression of opsin genes (for a review see Carleton, 2009), render photopigments the foundation of a versatile system for adaptation to varying environmental lighting demands (Hauser and Chang, 2017). Importantly, however, besides chromophore substitution, only qualitative or quantitative differential opsin gene expression may contribute to visual system adaptation within the same species in developing or mature fish. Such expression differences hold the potential for highly adjustable, possibly short-term, visual system adaptation to changes in the prevailing light habitat (Carleton, 2009; Marshall et al., 2015).

Qualitatively differential opsin gene expression occurs most commonly between ontogenetic transitions, i.e. from larval to adult stages, and is often accompanied by migration between different light habitats or a change in diet (Archer et al., 1995; Carleton et al., 2008; Cheng and Novales Flamarique, 2004; Cortesi et al., 2015a; Cottrill et al., 2009; Loew et al., 2002; Shand et al., 2008; Temple et al., 2008). Quantitative differences in opsin expression profiles have been shown in various freshwater and marine species including Lake Victorian cichlids (Seehausen et al., 2008) and marine damselfish (Stieb et al., 2016) inhabiting different depths, as well as killifish inhabiting spectrally distinct streams (Fuller et al., 2004) resulting in a shift of  $\lambda_{\max}$  to match specific light conditions. Furthermore, when reared under different artificial light, plasticity in opsin expression has been shown in cichlids (Hofmann et al., 2010), black bream (Shand et al., 2008), guppies (Ehlman et al., 2015; Sakai et al., 2016) and killifish (Fuller et al., 2005). Opsin expression plasticity in adult fish has been shown in killifish (Fuller and Claricoates, 2011; Fuller et al., 2010) and African cichlids (Nandamuri et al., 2017), which altered opsin expression levels within only a few days (Fuller and Claricoates, 2011) when exposed to changed habitat light. The variable nature of these findings suggests that opsin expression plasticity may be highly species specific, rather

than based on a general controlling mechanism mediating opsin expression based on photoreceptor quantum catch. There are two potential opsin gene controlling principles mediating visual pigment performance: either changes in opsin expression adjust visual sensitivities to regions of the spectrum where light is abundant (Hofmann and Carleton, 2009) [as reported for killifish (Fuller et al., 2004); black bream (Shand et al., 2008); Lake Malawi cichlids (Hofmann et al., 2010); damselfish (Stieb et al., 2016)], or alternatively, opsin expression changes lead to a decline of sensitivity in regions of the spectrum where light is abundant [(reported for the blue acara (Kröger et al., 1999; Wagner & Kröger, 2000)], known as a compensatory mechanism that helps maintain colour constancy (Wagner & Kröger, 2005).

The opsin repertoire in coral reef fish is less well studied, but offers excellent conditions to investigate mechanisms of visual system adaptation. With regard to species and colour richness, coral reefs are one of the most spectrally diverse ecosystems on earth - a diversity reflected in the complexity of visual communication among reef fish (reviewed in Marshall et al., 2006; Marshall et al., 2015). Considerable variation of photoreceptor spectral sensitivity (Losey et al., 2003), ocular media transmittance (Losey et al., 2003; Siebeck and Marshall, 2001), and opsin repertoire (Cortesi et al., 2015b; Hofmann et al., 2012; Phillips et al., 2015; Stieb et al., 2017) add to the challenge in understanding this system (Marshall et al., 2015). Stieb et al. (2016) demonstrated that subtle depth-dependent differences in environmental illumination correlate to differential opsin expression profiles in some damselfish species whereas others showed a stable expression profile. These findings highlight that opsin gene expression in reef fish in general may be highly species-specific, possibly due to different ecological and visual demands, or, alternatively, due to phylogenetic constraints. However, it is unclear whether such changes occur during developmental stages (i.e. priming during settlement) or can also occur post-settlement in mature fish. Furthermore, it remains unknown, whether changes in opsin expression under pronounced differences in environmental lighting are consistent between species, and more specifically, between ecologically distinct species.

To address this, we investigated the capacity of spectral visual system adaptation in three reef fish species, *P. amboinensis* (Ambon damselfish), *P. moluccensis* (Yellow damselfish) and *Ostorhinchus cyanosoma* (Yellowstriped cardinalfish). These species belong to two of the most speciose and abundant coral reef fish families, the damselfish (Pomacentridae) and cardinalfish (Apogonidae). Importantly, these families, despite sharing several ecological traits including strong association to coral, and, generally, strong site fidelity and resilience to habitat disruption (Gardiner, 2010; Marnane, 2000), feed at different times of day: damselfish are strictly diurnal whereas cardinalfish are predominantly crepuscular/nocturnal feeders (Emery, 1973; Marnane and Bellwood, 2002). With a few exceptions damselfish and cardinalfish go through an oceanic and pelagic larval phase after which they settle on the reef (Leis, 1991; Victor, 1991). As adults, the three species are found in small to large aggregations in clear lagoons, and coastal or seaward reefs (Randall et al., 1990). The fact that all three species co-occur in the same shallow-water coral reef zones, but are active at different times and light levels, makes them particularly interesting to test and compare mechanisms of spectral tuning.

The damselfish visual system, including opsin gene repertoire, is well understood (Hawryshyn et al., 2003; Loew and Lythgoe, 1978; Losey et al., 2003; Marshall et al., 2006; McFarland and Loew, 1994; Siebeck and Marshall, 2001; Siebeck et al., 2008; Siebeck et al., 2010; Stieb et al., 2017). SWS opsins appear to be expressed exclusively in single cones, whereas RH2 and LWS opsins appear to be expressed exclusively in double cones (unpublished data). However, as the cardinalfish visual system is less well known, we investigated the repertoire of expressed opsin genes in the cardinalfish *O. cyanosoma* using RNA-sequencing. We then examined whether changes in spectral tuning via opsin gene expression plasticity are possible in adult reef fish, and, similar or different between nocturnal cardinalfish and diurnal damselfish. To do this, we exposed the two species of damselfish and the one species of cardinalfish to different lighting conditions in terms of colour and intensity for up to six months. We then used quantitative real-time polymerase chain reaction (qRT-PCR) experiments to quantify opsin expression. Finally, we were interested in

understanding whether opsin expression follows dynamics that maximize signal strength, or functional maintenance and energy efficiency. Signal strength maximization would suggest photoreceptors shift opsin genes to increase photon catch under light conditions that provide relatively more photons at the relevant wavelengths than a reference light environment. In contrast, minimizing energy expenditure would suggest photoreceptors decrease the respective opsin gene to reduce the cost of neural transmission. To address this question, we modelled the  $\lambda_{\max}$  values of photopigments based on the identified opsin gene sequences, and used these to calculate the quantum catch of visual pigments under the experimental and natural light conditions.

## Materials & Methods

### Study species

Adult specimens (*P. amboinensis*: n = 45; *P. moluccensis*: n = 61; *O. cyanosoma*: n = 83) were obtained between 2015 and 2017 from an aquarium supplier (Cairns Marine Pty Ltd, Cairns, Australia), and shipped as quickly as possible (e.g. on the same day or within a few days). Additionally, one adult individual of *O. cyanosoma* used for *de novo* opsin gene sequencing was collected in February 2015 on the reefs surrounding Lizard Island (14°40'S, 145°27'E), Australia, using SCUBA, and hand nets, and was collected under Great Barrier Reef Marine Park Permit (G12/35005.1), and Queensland General Fisheries Permit (140763).

After undergoing light treatments, fish were anaesthetized with an overdose of clove oil (10% clove oil; 40% ethanol; 50% seawater), killed by decapitation, and retinas were dissected from the eyecup and stored in RNA-later (Ambion) for subsequent molecular analysis. For opsin studies, tissues were sampled around midday between 11 am and 2 pm, and the date and time of dissection were noted. All experimental procedures were approved by The University of Queensland Animal Ethics Committee (QBI/223/10/ARC/US AIRFORCE (NF) and QBI/192/13/ARC).

## Light and control environments

At the start of the experiment a subset of individuals for each species (*P. amboinensis*, n = 8; *P. moluccensis*, n = 18; and *O. cyanosoma*, n = 18) were sacrificed immediately upon arrival in our lab and used as a baseline (time point = 0). Only one specimen of *P. moluccensis* was excluded from the baseline group as its eye was damaged and discoloured. All remaining individuals were kept under 12h light / 12h dark lighting conditions in aquaria filled with 200L saltwater and subjected to altered light (colour) and control (intensity) environments. The three tested species were kept in the same treatment aquaria. All tanks were illuminated by broad-spectrum high intensity LED (Radion<sup>TM</sup>, Ecotech Marine, Australia) and fluorescent black (FLH0T8BL/36, Toshiba, Japan) aquarium lights. Light environments (red, green, and blue) were generated using spectral filter sheets (182 Light Red, 124 Dark Green, 172 Lagoon Blue; LEE Filters, USA) (see Fig 7A).

Fish staying in the three colour habitats were sacrificed after one month (time point = 1, *O. cyanosoma*, n = 23; *P. moluccensis*, n = 9; *P. amboinensis*, n = 22), four months (for *O. cyanosoma*, n = 18), and six months (for *P. amboinensis*, n = 15 and *P. moluccensis*, n = 17). We decided to terminate the experiment for *O. cyanosoma* after four months to avoid potential health effects as previous husbandry of *O. cyanosoma* has occasionally proven difficult, reflecting the delicate nature of most cardinalfish species.

After results of colour treatments were known, additional individuals of *O. cyanosoma* (n = 23) and *P. moluccensis* (n = 17) were placed in three additional light treatments to test effects of light intensity. *P. amboinensis* could not be obtained due to a coral bleaching event on the GBR in 2016. One experimental group was exposed to unfiltered light (Fig. 7A). Two additional groups were exposed to light attenuated by neutral density filters (298 0.15ND, 210 0.6ND; LEE Filters, USA) reducing light intensity by 60-80% (filter 298) or 20-30% (filter 210) while not completely blocking any part of the spectrum (Fig. 7A). Intensity treatments were run for one month (see Table



S1 for a summary of specimens used), as this had been shown to be long enough to induce expression changes.

## **Opsin gene studies**

For *P. amboinensis* and *P. moluccensis*, opsin genes and their classification have been determined previously (Hofmann et al., 2012; Stieb et al., 2016). As no such data was available for *O. cyanosoma*, and to verify the opsin genes previously identified in the damselfish, we initially sequenced retinal transcriptomes of three specimens and validated opsin gene classification using phylogenetic methods.

In order to quantify opsin gene expression, we performed quantitative real-time polymerase chain reaction (qRT-PCR). All retinas were homogenized using a TissueLyser LT (Qiagen, Netherlands) and total RNA was extracted with the RNeasy Mini Kit (Qiagen, Netherlands) following the manufacturer's protocol. An optional DNase digestion step was performed to eliminate traces of genomic DNA. Retinal RNA was reverse transcribed using the High Capacity RNA-to-cDNA kit (Applied Biosystems).

### **A - Opsin gene sequencing (RNAseq) & analysis**

RNA was quality checked with an Agilent 2100 BioAnalyzer 6000 NanoChip (Agilent Technologies, USA). RNAseq libraries were made using the TruSeq RNA Sample Preparation Kit v.2 (Illumina, San Diego, USA), and the retina specific transcriptomes were sequenced as 125bp paired reads on the Illumina platform (HiSeq2000 v4) by the sequencing facility within the Queensland Brain Institute at the University of Queensland, Australia. Samples were multiplexed at 12 samples per lane obtaining between 20 – 30 million sequenced reads per sample.

Data was processed using the online Bioinformatics platform Galaxy (Research Computing Centre, The University of Queensland, Australia) (Afgan et al., 2015). Reads were quality checked using FastQC, and high copy sequences, such as primers and library indices were removed using Trimmomatic. Furthermore, regions with quality scores below 20 were removed by cropping at the start and end of a reads, as well as by using a sliding window quality crop. Finally, reads with lengths less than 80 bps were dropped from the analysis. Trinity was used for *de-novo* assembly of transcripts, with a group pair distance of 250 bp, and minimum inchworm kmer coverage of 2.

Further bioinformatics analyses were performed using Geneious software (Version 9.0.4). For *P. amboinensis* and *P. moluccensis*, assembled transcripts were mapped to species-specific known and publicly available opsin genes (*P. amboinensis*: SWS1 HQ286506, SWS2B HQ286516, RH2B HQ286526, RH2A HQ286536, LWS HQ286546, RH1 HQ286556; *P. moluccensis*: SWS1 KU745428, SWS2B KU745427, RH2B KU745429, RH2A KU745430, LWS KU745432, RH1 KU745431). To identify SWS2A opsin genes of *O. cyanosoma*, the assembled transcripts were also mapped to reference opsin gene sequences from the Dusky dottyback (*Pseudochromis fuscus*, GenBank accession No.: KP004335.1). For each species and all opsin genes identified, we further followed the methods described in de Busserolles et al. (2017) to manually check for gene duplications. Briefly, after identification of candidate gene coding sequences, unassembled reads were mapped to the opsin gene repertoire of the species using medium-sensitivity settings (70% identity threshold). Deviating reads were then extracted by working from single polynucleotide polymorphism (SNP) to SNP by exploiting paired-end matching to cover gaps, and their consensus sequence was used as species-specific reference for repeated high-specificity (100% identity) mapping of unassembled reads until maximum obtainable sequence length was reached.

To confirm the assignment of the newly identified opsin genes of *O. cyanosoma* to the known opsin classes, we aligned their amino acid sequences with the opsin genes of the zebrafish (*Danio rerio*), the Japanese ricefish (*Oryzias latipes*), the Bluefin killifish (*Lucania goodie*), the lake Malawi cichlid (*Metriaclima zebra*), and Nile tilapia (*Oreochromis niloticus*) (see Figure 1 for GenBank accession numbers). We then estimated maximum likelihood phylogenies for each gene based on the amino acid sequences using RAxML 8.2.10 (Stamatakis, 2014) on the web based platform CIPRES (Miller et al., 2010), followed by a rapid bootstrap analysis with 1000 replicates. The highest scoring tree was selected as the best tree.

## **B - Opsin gene expression using quantitative real-time polymerase chain reaction (qRT-PCR)**

We quantified relative opsin gene expression using qRT-PCR [SYBR Green master (Rox) dye (Roche)] on a StepOnePlus Real-Time PCR System (Applied Biosystems, USA). Following previously described methods (Carleton and Kocher, 2001; Stieb et al., 2016; Stieb et al., 2017), relative opsin gene expression was calculated from the efficiency and critical cycle number ( $C_t$ ), as relative single (SWS opsin genes) and double (RH2 and LWS genes) cone opsin expression as a fraction of the total of single, or double cone opsin genes expressed, and relative rod opsin gene expression as the fraction of all opsin genes expressed. The distinction of single and double cone opsin was chosen as *in-situ* hybridization assays on several damselfish and other reef fish species suggest this expression is specific to particular cell types (unpublished data), and because it prevents the masking of expression changes in the less abundant single cone opsins by highly abundant double cone opsins. All percentage values are reported as median and interquartile range.

For qPCR reactions targeting opsin genes of *P. amboinensis* and *P. moluccensis*, we used publicly available and already validated primers (Table S2) from Stieb et al. (2016). For *O. cyanosoma*, we followed the methods as per Stieb et al. (2016, 2017) and designed unique primers (Table S2) for each opsin gene with either the forward or the reverse primer spanning an exon-exon

boundary (except for the intronless RH1) to ensure only cDNA would be amplified with a product length of 60 – 100 bp. Primer efficiencies (Table S2) were tested using a five orders of magnitude dilution series of a species-specific opsin pool. The opsin pool contained equal ratios of fragments of each opsin gene (molarity of fragments was measured using an Agilent 2100 BioAnalyzer High Sensitivity DNA Chip, Agilent Technologies, USA) that were amplified from cDNA using pool primers (see Table S2) specifically designed for each opsin gene identified in the *O. cyanosoma* transcriptome. Products were separated via gel-electrophoresis, then cut out from the gel, and purified using the QIAquick PCR Purification Kit (Qiagen, Netherlands). The RH1 amplicon was additionally Sanger sequenced for sequence verification. All experiments were carried out with three technical replicates, and samples originating from the different light and control experiments were randomly assigned to each qPCR plate.

## **Relationship of opsin expression with light and control treatments**

To test whether opsin gene expression changed as a consequence of exposure to different light and control treatments, we used the beta regression method based on the R package BETAREG (Cribari-Neto and Zeileis, 2009). This regression allows handling of non-transformed data to model percentages and proportions. The beta distribution can be of variable shape, and is, therefore, suitable for the analysis of relative opsin gene expression as our dependent variable. To identify relationships between relative opsin expression and different time points, each time point was used as a categorical factor. To test for differences between different light and control treatments, categorical factors were set for each treatment. Repeated hypothesis testing was accounted for by using a Bonferroni correction considering six tested hypotheses for comparisons between treatments and baseline, and five tested hypotheses for comparisons between treatments and no filter treatment (one per treatment group). P-values were thus calculated according to  $p = \alpha/m$ , with  $m=6$  or  $m=5$ , respectively. Analyses were performed in R (R Core Team 2011) using the interface RSTUDIO (Version 0.98.1062).

## Spectral sensitivity modelling

The spectral sensitivities of the different cone and rod opsin classes identified in *O. cyanosoma*, *P. amboinensis*, and *P. moluccensis*, were modelled using the translated amino-acid sequences. Opsin amino-acid sequences were aligned with bovine rhodopsin (GenBank Accession No.: NP\_001014890.1). This allowed inferring the loci of transmembrane regions and the identification of known retinal chromophore binding pocket sites, as well as previously discovered tuning sites, based on the protein structure (i.e. summarized in Hunt et al., 2001; Yokoyama, 2008).

Furthermore, amino-acid comparisons of the identified opsin genes to those of other fish species with known opsin  $\lambda_{\max}$ , was used to infer tuning effects where possible. Our opsin gene sequences were aligned with those of the cichlids *Metriaclima zebra*, and *Oreochromis niloticus*, the Killifish (*Lucania goodei*), the Japanese ricefish (*Oryzias latipes*), as well as the Dusky dottyback (*Pseudochromis fuscus*). The opsin genes found in these species have been studied extensively, including *in-vitro* opsin protein expression studies to assess pure protein spectral absorbance, and microspectrophotometry (i.e Carleton, 2009; Cortesi et al., 2015a). Damselfish photoreceptor absorbance had previously been measured using microspectrophotometry (summary in Stieb et al., 2016).

We focused on variable amino acid residues that either occurred in areas corresponding to the retinal binding pocket and were substitutions that resulted in a change in polarity, or at known tuning sites (Dungan et al., 2016; Takahashi and Ebrey, 2003; Yokoyama, 2008). Final calculations were based on pure opsin spectral absorbance of the photopigments of *Oreochromis niloticus* (Spady et al., 2006), *Lucania goodei* (Yokoyama et al., 2007) or *Oryzias latipes* (Matsumoto et al., 2006; RH1). Tuning effects of the amino-acid residues present at the sites in question were inferred directly at sites of known tuning effects. Tuning effects of other variable amino-acid residues between the species were inferred based on the  $\lambda_{\max}$  differences of the known sequences and the

variable sites present (see S9 for a summary of bovine rhodopsin aligned site effects considered). Errors in inferred spectral sensitivities will have small effects on quantum catch calculations.

Notable is the fact that we did not test chromophore composition at any stage in our experiment as it is unlikely to occur in our test species. Evidence suggests a limitation to the A1 chromophore in marine fish, which we based our  $\lambda_{\max}$ -calculations on. Shifts from one chromophore to another are thought to occur only in fish that undergo extreme habitat changes that bring about a drastic change in environmental conditions, such as in eel or salmon (Beatty, 1966; Beatty, 1975; Beatty, 1984; Wood et al., 1992). Our test species though are confined to a marine environment throughout their adult life history.

## **Light measurements & quantum catch calculation**

The light spectrum in each treatment tank, and, for comparison, on a shallow reef (2m) off Lizard Island around midday in March 2015, were determined by measuring 45 degree downwelling radiance using a UV/VIS 100 $\mu$ m optic fibre (OceanOptics, USA) connected to a USB2000 spectrophotometer (Ocean Optics, USA), and the software Spectrasuite (OceanOptics, USA). For absolute radiance measurements, the fiber and spectrophotometer were calibrated using a Xenon Arc calibration light source (OceanOptics, USA).

Visual system efficiency, as determined by the total quantum catch (Q) of each photopigment under the experimental light conditions, was estimated using the equation:

$$Q = \int Ra(\lambda)R(\lambda)d\lambda$$

where  $Ra(\lambda)$  is the absolute radiance spectrum, and  $R(\lambda)$  is the photoreceptor absorption calculated using the equations for the bovine rhodopsin template as explained in detail by Govardovskii et al. (2000).

$\lambda_{\max}$ -values as determined by amino-acid based modelling (SWS2B, SWS2A, RH2B, RH2A, LWS), and microspectrophotometry (SWS1), were used to generate photoreceptor absorbance curves, and to calculate the quantum catch of hypothetical photopigments, one for each identified cone opsin class, and under each lighting condition. As an additive sites model for site effects in SWS1 genes is not well supported, we conclude that SWS1  $\lambda_{\max}$  gained from MSP measurements undertaken in *P. amboinensis* (Losey et al., 2003) are more robust than any estimate. As SWS1 is only expressed in damselfish and SWS1 sequences of both test species are identical in tuning sites, we therefore used those SWS1  $\lambda_{\max}$  for both *P. amboinensis* and *P. moluccensis*. We are also aware that increasing evidence suggests opsin gene co-expression in cones (Dalton et al., 2014; Dalton et al., 2015; Dalton et al., 2017; Torres-Dowdall et al., 2017), however, as this information is unavailable for our study species, we believe that for the overall conclusion of our study, our estimated quantum catches will provide a good enough first estimate.

To test for correlation between relative opsin expression and opsin specific photopigment quantum catch, we used Kendall's  $\tau$ -b correlation using the Kendall package in R (McLeod, 2005). Quantum catch data was ln-transformed for visualization purposes only. Kendall's  $\tau$ -b allows the correlation of non-normally distributed data by assigning and correlating the ranked data.

## Results

### Opsin gene sequences using RNAseq

RNA-sequencing and *de-novo* transcript assembly reconstructed complete coding sequences of five different opsin gene classes in *O. cyanosoma*. Their identity was confirmed by amino-acid based maximum likelihood phylogenetic inference that grouped the newly discovered genes with those of previously well studied fish species (Figure 1): four cone opsins (SWS2A, RH2B, RH2A, LWS), and one rod opsin (RH1). Two sister copies of the SWS2A gene (SWS2A $\alpha$ , SWS2A $\beta$ ), and one sister gene each of the RH2B (RH2B2) and RH2A (RH2A2) gene were identified. However, as

both RH2 duplicates were lowly expressed and could not be assembled to full coding sequence length, these two genes were omitted from further analyses.

RNA-sequencing and *de-novo* assembly of the retinal transcriptome of *P. moluccensis* and *P. amboinensis* confirmed previous reports of six opsin genes (five cone opsins: SWS1, SWS2B, RH2B, RH2A, LWS; and one rod opsin: RH1) found in damselfish (Hofmann et al., 2012; Stieb et al., 2016), and furthermore allowed complete reconstruction of their coding sequence (Figure 1).

## Light dependent opsin expression

Opsin expression values (for a summary see Table S3) are presented in relative percentage, were normalized within cone types (single cones, double cones), and are presented as median percentage and interquartile range.

At time 0 (baseline), the yellow-striped cardinalfish expressed SWS2A $\alpha$ , SWS2A $\beta$ , RH2B, RH2A, LWS and RH1. The total retinal opsin repertoire was dominated by RH1 opsin, making up 91.2% (3.9) of all expressed retinal opsin (Figure 2 A). In single cones, *O. cyanosoma* almost exclusively expressed SWS2A $\beta$  (90.6%, 7.5). In double cones, RH2A was expressed strongest (82.5%, 8.6), RH2B at lower levels (17.1%, 8.5), and LWS very low (0.4%, 0.9). Variability in expression was greatest among RH2 (i.e. RH2B: 7.1% - 43.6%), and small among SWS2A genes.

At time 0 (baseline), both damselfish species expressed SWS1, SWS2B, RH2B, RH2A, LWS and RH1. Rod opsin made up only 63.2% (11.0) (*P. moluccensis*), and 58.7% (6.5) (*P. amboinensis*) of total opsin (Figure 2 B, C). Among single cone opsins, both species expressed predominantly SWS1 (*P. amboinensis*: 86.6%, 9.6, *P. moluccensis*: 85.0%, 12.5). Notable is that levels of SWS genes showed large variability, particularly in *P. amboinensis*. In double cones, both species expressed comparable amounts of RH2B and RH2A (*P. amboinensis*: RH2B = 45.0%, 4.0; RH2A = 54.5%, 3.9; *P. moluccensis*: RH2B = 43.4%, 3.1; RH2A = 52.2%, 2.7), but differed in LWS expression (*P. amboinensis*: LWS = 0.4%, 0.4; *P. moluccensis*: LWS = 3.6%, 2.1,  $p < 0.00017$ ).



Under altered illumination we observed major shifts in opsin expression in the three investigated reef fish species. We observed effects following altered light spectrum, light intensity, and treatment duration, as well as differences in effects between opsin gene classes and fish family. A summary of the beta-regression statistics for the tested comparisons of baseline and treatment expression levels is provided in Table S4. The ratio of single cone opsins in damselfish, namely SWS1 and SWS2B, showed the largest changes (Figure 3 – 6). In colour treatments low in short wavelength radiation, rapid shifts from SWS1 (370 nm) to SWS2B (408 nm) (see Table 1) expression in damselfish were observed (Figure 3 – 5 (C - F)). Generally, these shifts occurred rapidly after only one months, and were even stronger after six months. *P. moluccensis* showed a shift in SWS1/SWS2B ratio similar in nature to that observed in *P. amboinensis*, but this was not statistically significant, perhaps due to the low number of replicates. Rapid shifts towards SWS2B were also observed in intensity treatments, but the extent was less the more UV radiation that was available (Figure 6 D - F). In *O. cyanosoma*, we also observed rapid shifts among single cone opsins (Figure 3 – 6). Here, the ratio of SWS2A $\alpha$  (448 nm) to SWS2A $\beta$  (468 nm) (see Table 1) shifted to the longer tuned photopigment after one month of red treatment (Figure 5A). Under the two brightest intensity treatments (Figure 6 A and B; no filter and 0.15ND) the ratio of SWS2A $\alpha$  to SWS2A $\beta$  shifted to the shorter tuned photopigment. Under blue, green and 0.6ND treatment, single cone opsin expression remained unchanged.

Expression levels among double cone opsins were generally more rigid, showing, where present, only delayed changes in opsin expression under the different treatments conditions. There were also differences in affected genes between damselfish and cardinalfish. In *O. cyanosoma*, the ratio of RH2B/RH2A opsin (476 nm resp. 518 nm, see Table 1) shifted towards RH2A in the colour treatments (Figure 3 – 5; A, B), however, this effect only showed in the six months treatment groups. The no filter and 0.6ND group showed a shift from RH2A to RH2B after one month; in the 0.15ND group double cone opsin expression was unchanged (Figure 6; A, B). LWS (544 nm, see Table 1) expression was unaffected by changed light conditions. In damselfish, double cone opsin

expression remained comparably stable following changes in lighting conditions. Observed changes that were statistically significant were generally small, or reverted back to baseline levels - thus likely mostly attributable to natural variability. However, LWS (554 nm, see Table 1) expression in *P. moluccensis* saw a small increase after six months blue light, one and six months green light, six months red light, and one month of unfiltered aquarium light. RH2 opsin gene expression in both species was largely unaffected by colour treatments, or reverted back to pre-exposure levels (i.e. Figure 4; E, F), except for reduced RH2A (518 nm, see Table 1) expression in *P. moluccensis* in the no filter and the 0.15ND groups.

## Spectral sensitivity modelling

An overview of the considered amino-acid positions in each investigated gene, as well as the known or estimated substitution effects, are given in Figure S5. On the whole, there were few variable tuning sites compared to other species with known  $\lambda_{\max}$ , suggesting our predictions are reasonable approximations. In addition, because of the tuning site similarities for both *Pomacentrus* species, their gene predictions are identical for all opsins.

A summary of our calculated  $\lambda_{\max}$  values, along with, where available, reported MSP measurements from the same or related species are given in Table 1. We calculated the resulting photopigments in damselfish to be maximally sensitive to 370 nm (SWS1), 408 nm (SWS2B), 480 nm (RH2B), 518 nm (RH2A), and 554 nm (LWS). These calculations conform well with values previously obtained using MSP. In *O. cyanosoma*, we calculated the photopigments to be maximally sensitive to 448 nm (SWS2A $\alpha$ ), 468 nm (SWS2A $\beta$ ), 476 nm (RH2B), 518 nm (RH2A), and 544 nm (LWS). To our knowledge, to date, MSP measurements in Apogonidae, have only been reported on *Pristiapogon kallotperus* (Losey et al. 2003), thus we list these for reference.

## Light measurements and Quantum catches

Figure 7 gives an overview of light environment spectra used (A), visual pigment absorbance curves generated from  $\lambda_{\max}$  calculations for *O. cyanosoma* (B), *P. amboinensis* and *P. moluccensis* (C), as well as calculated quantum catches (D - G) and correlation plots with opsin gene expression (H). A summary of all calculated quantum catches is provided in Table 2.

Calculated quantum catches in treatments were of similar magnitudes to those calculated for a natural reef setting, except for the red, ND0.15 and ND0.6 treatments in which quantum catch was up to 20-fold lower. Overall, under reef illumination, quantum catch was dominant for double cones, slightly less for single cones in *O. cyanosoma*, and distinctly less in *P. moluccensis* and *P. amboinensis*.

Under blue treatment illumination, quantum catch was short wavelength-shifted. As a result, single cone opsins collected relatively more photons than double cone opsins in *O. cyanosoma*. However, in *P. moluccensis*, single cone opsin quantum catch was very low for SWS1 pigment, but remained comparably high for SWS2B pigment. In both species among double cone opsins, RH2B collected the most photons. Under green illumination, quantum catch in both species was long wavelength-shifted, such that double cone quantum catch dominated single cone quantum catch. In these conditions, RH2A was best tuned to the available light spectrum in both species. The strong light attenuating properties of the red filter lead to conditions such that in both species, quantum catch for all photopigments but the LWS-based one was up to 20 times lower than under a reef spectrum. Due to UV filter properties of the colour filters used, neither of the three colour treatments strongly stimulated the SWS1-based pigment.

All three light intensity treatment spectra resulted in similar quantum catch ratios between the opsin-based pigments. Differences in total caught quanta matched the expectation based on the light intensity. In *O. cyanosoma*, quantum catch of the five pigments was almost equal, suggesting a relative increase in single cone opsin expression compared to double cone opsin, and among single cone opsin, SWS2A $\alpha$  compared to SWS2A $\beta$ . Total quantum catch, however, was

between two times greater (no filter) and five times (0.6ND) lower than under a reef spectrum. In *P. moluccensis*, relative quantum catch between the five opsin-based pigments was similar under the different conditions, albeit at different total numbers of absorbed quanta.

Test results for whether shifts in opsin expression are proportionate to the quantum catch resulting from the different light treatments using Kendall- $\tau$  correlation coefficients are given in Table 3. Due to the small extent of changes in RH2 opsin genes in *P. moluccensis* and lack of changes in LWS in *O. cyanosoma*, we emphasize the relationship of single cone opsin, RH2 opsins in *O. cyanosoma*, and LWS in *P. moluccensis*. Overall, in *P. moluccensis* and *O. cyanosoma*, single cone opsin expression strongly correlated with quantum catch (Figure 7 H 1-3). SWS1 correlated positively with quantum catch under colour and intensity treatments (Figure 7 H 1, 2), while SWS2A $\alpha$  correlated positively with quantum catch under colour treatments only. In *O. cyanosoma*, neither of the RH2 opsin genes showed correlation with quantum catch across all-treatments (intensity + colour). However, analyzing intensity and colour separately, revealed that under colour treatments, decreased RH2B expression coincided with decreased RH2B quantum catch, and increased RH2A expression coincided with increased RH2A quantum catch. In intensity treatments, on the other hand, quantum catch did not correlate with opsin expression, thus masking these effects in the combined analysis. In *P. moluccensis*, LWS opsin gene expression correlated with quantum catch in colour treatments but not in intensity treatments (Figure 7 H).

## Discussion

In this study, we investigated the potential for phenotypic plasticity in opsin expression possibly affecting photoreceptor spectral sensitivity in adult coral reef fish by comparing species with a diurnal versus nocturnal feeding activity. We first identified the previously unknown opsin complement in cardinalfish (Fig.1). We then exposed damsel- and cardinalfish to altered light conditions in the lab (Fig. 7A) and measured the levels of expressed opsin genes in the retinal tissue. We found that in the cardinalfish retina, the total opsin pool is dominated by rhodopsin (RH1

approx. 90%) and thus different from damselfish in which rhodopsin only makes up approximately 60% of total opsin (Fig. 2). This is consistent with their different ecologies, as nocturnal cardinalfish expressed more of the low light sensitive rhodopsin than diurnal damselfish. Furthermore, we found that the damselfish cone opsin repertoire is tuned to shorter wavelengths than the cardinalfish opsin repertoire, by means of UV-sensitive SWS1 and SWS2B opsins (Fig. 2). Our experiments further demonstrate that opsin gene expression can vary within several months or weeks, but that this plasticity differs between damsel- and cardinalfish (Fig. 3-6). Our data further indicates that environmental light can induce opsin expression changes via variation of intensity and spectrum, however only in cone opsin genes, while rhodopsin levels remain unaffected. We found that single cone opsin gene expression demonstrated a more rapid change under most conditions compared to double cone opsin gene expression. Furthermore, correlation analysis indicates that quantitative opsin expression does correlate with quantum catch, however, with differences between specific opsin gene classes (Fig. 7D, H; Table 2 and 3).

### **Opsin repertoire and spectral sensitivities in damselfish and cardinalfish**

RNA-sequencing confirmed the damselfish opsin repertoire previously described (Hofmann et al., 2012; Stieb et al., 2016, 2017). Five cone opsins (SWS1, SWS2B, RH2B, RH2A, LWS), as well as one rod opsin (RH1), are expressed in the damselfish retina. The retinal opsin gene repertoire we identified in the Yellow striped cardinalfish, *O. cyanosoma*, comprises five cone opsins (SWS2A $\alpha$ , SWS2A $\beta$ , RH2B, RH2A, LWS) and one rod opsin (RH1).

Whereas our calculation of damselfish visual sensitivities match well with values previously obtained using MSP, those calculated for the cardinalfish only match in part (Table 1). For cardinalfish, there is little data on photoreceptor spectral sensitivity (Cronin et al., 2014; Losey et al., 2003). In the Iridescent cardinalfish, only one type of single cone and two spectrally distinct double cone types were identified using MSP (Losey et al. 2003). The deviations of sensitivity from our calculations may be explained by opsin co-expression, which is not accounted for in our

modelling, or if genes expressed at very low levels are not functional (LWS, 1% of double cone opsin). However, MSP measurements of single cones in the Dusky dottedback (Cortesi et al., 2015a) concur mostly with our SWS2A calculations.

Considering *O. cyanosoma*'s opsin repertoire, high SWS2A $\beta$  and RH2A, low RH2B and SWS2A $\alpha$ , and very low LWS, it is possible that their colour vision system operates using a dichromatic opponency mechanism under photopic light conditions. However, without further insight into how and where on the retina these opsins are expressed, this remains unclear. Dichromacy has been suggested to be highly efficient in environments that offer two main colours, such as algae and corals, or in a restricted light environment (Chiao et al., 2000; Lythgoe, 1979; Marshall et al., 2003). Cardinalfish are nocturnal, spending the night primarily feeding on benthic or planktonic invertebrates (Barnett et al., 2006; Marnane and Bellwood, 2002). With a rod-opsin to cone-opsin ratio of approximately 9:1, the cardinalfish visual system shows typical adaptations to life in dimly lit environments (de Busserolles and Marshall, 2017; Hunt et al., 2001; Wikler and Rakic, 1990). This increased rhodopsin (RH1) ratio suggests that colour vision in cardinalfish may be restricted in its functionality, and adapted to subserve mostly specific colour tasks during the day, such as social interaction (Kuwamura, 1985).

The expression patterns we found in damselfish, high SWS1, RH2B, and RH2A, and low LWS and SWS2B, confirmed those previously reported in wild specimens (Stieb et al. 2016, 2017), and are used to discriminate between colours (Siebeck et al., 2008). The difference between both families' opsin repertoires with probably the greatest functional impact is the presence of UV-sensitive SWS1 and violet sensitive SWS2B opsin in damselfish in place of blue sensitive SWS2A $\alpha$  and SWS2A $\beta$  in cardinalfish, shifting spectral sensitivity in damselfish into ultraviolet wavelengths. UV-reflecting body patterns are common in both families (Marshall, 2000; Stieb et al., 2017), supporting hypotheses that small reef fish may benefit from a covert short-range communication channel invisible for larger, UV-blind predatory fish (Siebeck et al. 2010). All damselfish investigated to date express an SWS1 opsin gene (Stieb et al., 2017), forming visual pigments

sensitive to UV-light (Hawryshyn et al., 2003; Loew and Lythgoe, 1978; Losey et al., 2003; Marshall et al., 2006; McFarland and Loew, 1994), and possess ocular media transmitting UV-light (Siebeck and Marshall, 2001). *P. amboinensis* has been shown to use these features to identify con- and heterospecifics based on UV-reflecting facial markings (Siebeck et al. 2010).

### **Phenotypic plasticity in opsin expression induced by changed lighting conditions**

Our results provide evidence for the presence of phenotypic opsin expression plasticity in coral reef fish from two families. In diurnal damselfish, UV-sensitive (SWS1) and violet sensitive (SWS2B) single cone opsins appeared most susceptible to changes in light conditions. Similarly, however, to a lesser extent, blue sensitive single cone opsins (SWS2A $\alpha$ , SWS2A $\beta$ ) in nocturnal cardinalfish responded to changes in light conditions, suggesting a high degree of plasticity and adaptability in these opsins. Double cone opsins were less plastic, showing large shifts only in RH2 genes in the nocturnal cardinalfish. It is important to highlight that expression changes were also observed in fish exposed to the unfiltered (no filter) aquarium light treatment when compared to our baseline. In *P. moluccensis*, these changes were not significantly different from those observed under the other treatments, thus clouding the distinction between effects of light environment and potential other confounding factors for this species, e.g. stress, season or dietary changes (Table S4). This is further complicated since the no filter spectrum can hardly be considered a negative control as it, too, differs from the conditions present on the reef. Additionally, holding times may have affected opsin gene expression. For example, time spent in the supplier's facility reportedly did not exceed a few days, however, as they were provided by an external supplier, we cannot be certain that this was consistently followed for all individuals.

Changes in opsin expression could serve as a rapid mechanism to shift photoreceptor spectral sensitivity in order to adapt to altered optical conditions of the environment, thus maintaining optimal visual perception of vital cues in their immediate surrounding. Altered conditions of the light environment can be associated with seasonal change, a phenomenon

particularly common in freshwater systems, but also known to occur in marine habitats, particularly in coastal regions and tropical coral reefs due to increased terrestrial organic matter runoff as a result of wet-season rainfall (Lythgoe, 1979; McClanahan, 1988; Munz and McFarland, 1977). Such effects are commonly associated with algal blooms, or increased amounts of other particulate matter in the water column, and a result of prolonged daylight duration, increased water temperature, increased rainfall and increased land run-off, variable solar radiation intensity, or a combination of these factors (Lythgoe 1979, Munz et al. 1977, McFarland & Munz 1975). Increased particulate organic matter, or increased phytoplankton, generally leads to a long-wavelength shift of the available light spectrum due to light absorption, suggesting that the visual system response observed in this study under altered lighting conditions could be found in nature. In fact, there are several accounts reporting seasonal periodicity in fish visual system characteristics, like altered spectral sensitivity in the three-spined stickleback (*Gasterosteus aculeatus*) (Cronly-Dillon et al., 1968), altered opsin gene expression in the damselfish (*Pomacentrus nagasakiensis*) (Stieb et al., 2016) and the Japanese ricefish (*Oryzias latipes*) (Shimmura et al. 2017) to name a few. Whether the expression changes observed in *P. nagasakiensis* by Stieb et al. (2016) were in fact due seasonal change remained unclear. Thus, further investigation in this direction is needed to clarify the effects of season on reef fish opsin expression.

Differences in ambient light at different depths is also important to consider. Both damselfish species and *O. cyanosoma* reportedly occur at up to 40 m depth (Allen et al., 2003; Randall et al., 1990). Stieb et al. (2016) showed that damselfish collected from different habitat depths did differ in opsin expression as a result of adaptation to changed lighting conditions. However, it remained unclear whether the observed changes resulted from plasticity during juvenile settlement, or whether the animals retained expression plasticity in adulthood. As our data suggests, the tested damselfish may have developed those expression changes after they reached maturity. Nevertheless, damselfish and cardinalfish generally display high site fidelity (Gardiner and Jones,



2005; Marnane, 2000; Petersen, 1995), making change of habitat depth or geographical relocation unlikely candidates to demand visual system adaptation in adults of these species.

According to the offset hypothesis, a dichromatic visual system is best tuned to an environment if one of its sensitivities is matched to the overall environmental backlight, and the other is offset from this background in order to allow contrast detection (Lythgoe, 1979). This principle may explain the differences observed between single and double cone opsin gene expression, and therefore possibly, the differences observed between damselfish and cardinalfish. In the above scenario, the overall environmental backlight is likely the least variable parameter. Overall, environmental backlight on coral reefs peaks around approximately 500 nm (Marshall et al., 2003; Matz et al., 2006), a wavelength reef fish double cones are well matched to (Losey et al., 2003). Wavelengths at either end of the spectrum, on the other hand, are attenuated rapidly with increasing depth or distance (Lythgoe 1979) while 500 nm light intensity remains comparably constant. Under these circumstances, constructing a visual system with set double cone but comparably plastic single cone spectral sensitivities, would supply the most feasible adaptive system.

Rhodopsin expression remained largely unaffected by changes in light in all tested species, regardless of shifts in spectral distribution or light intensity. For a monochromatic visual system, any change in light condition effectively only changes perceived intensity as different spectral channels for comparison are not available (Gegenfurtner and Kiper, 2003). Our study species and other investigated shallow water reef fish express only one RH1 opsin, and to date, more than one rhodopsin has been found among fish only in several deep-sea species (de Busserolles et al., 2015; Partridge et al., 1992; Pointer et al., 2007), carp (Lim et al., 1997) and the zebrafish (Morrow et al., 2017). Hence, if changed light conditions had had an effect, we would have expected to see this in all treatment groups differing in light intensity. In fact, from other systems, rhodopsin expression is known to fluctuate following a circadian rhythm (Korenbrod and Fernald, 1989), however, it seems that in the timeframes we investigated here this is not affected.

## **How to improve visual sensitivity with changing light conditions: direction of expression change in cone opsins differs between opsin class**

To investigate whether changes in the spectral composition of the light environment favor opsin gene expression up- or downregulation by means of visual pigment performance, we calculated quantum catches of each photopigment modelled from the peak spectral absorbance calculated using the opsin genes' amino-acid sequences. Our results suggest that both strategies are employed and that it depends on the nature of the environmental change, as well as on the affected pigment, which strategy will drive opsin expression change. For instance, SWS1 opsin gene expression in Pomacentrids correlated positively with increased quantum catch of the *SWS1* photopigment. Consequently, SWS1 expression in comparison to SWS2B expression dropped in a proportionate manner upon exposure to gradually decreasing UV-radiation. This agrees with reports of long wavelength shifted spectral sensitivities in black bream reared in short wavelength reduced conditions (Shand et al., 2008), but is seemingly in contrast to a reported reduction of blue sensitive single cones in blue acara, when reared under monochromatic blue light (Kröger et al., 1999; Kröger et al., 2003; Wagner and Kröger, 2000; reviewed in Wagner and Kröger, 2005). The non-compensatory principle apparently controlling SWS gene expression in damselfish may greatly influence visual system capabilities in an ecological context such as their ability to use UV-signals for con- and heterospecific identification (Siebeck et al., 2010). As known habitat depth extends to 40 m (Randall et al., 1990), a significant difference in available UV illumination from high in surface waters to almost nothing at depth on the reef is a real consideration here (Cronin et al., 2014).

In *O. cyanosoma*, RH2B expression positively correlated with quantum catch in colour treatments, suggesting the adaptive response is driven by RH2B expression. LWS expression in *P. moluccensis*, in comparison, correlated negatively with quantum catch, further illustrating that the effect of changed light conditions is dependent on the nature of the change and the available opsin repertoire.

### **Potential mechanisms facilitating differential cone opsin gene expression**

Differential opsin gene expression could be facilitated by various mechanisms. The number of photoreceptor cells or outer segment size may change and thus provide more or less room for the opsin. In cichlids reared under chromatically deprived light conditions, both mechanisms were observed (Kröger et al., 1999; Wagner and Kröger, 2000; Wagner and Kröger, 2005). Increasing evidence suggests that gene co-expression can also shift spectral sensitivity via differential opsin gene expression. Opsin co-expression in individual photoreceptors is known to occur in fish (Dalton et al., 2014; Dalton et al., 2015; Dalton et al., 2017; Takechi and Kawamura, 2005; Torres-Dowdall et al., 2017) and allows rapid adjustments of the opsin complement without making structural changes to the retinal anatomy. By yielding photoreceptors with peak spectral sensitivities intermediate between those of pure opsin based photoreceptors, co-expression may furthermore be an effective means to achieve optimal backlight matching.

Lastly, species differences in total retinal cone opsin amounts and the relative proportion of photoreceptors subserving colour and luminance vision, respectively, may facilitate different adaptive responses in opsin gene expression changes. If one assumes two visual systems with similar proportion of photoreceptors tasked with colour and luminance vision, but with different total cone opsin volumes, the one with less cone opsin available (i.e. cardinalfish) should show greater sensitivity to expression changes, since smaller increases or decreases of gene expression have a larger effect on relative differential gene expression. As a consequence, even if the net change in gene expression in both systems were similar, relative expression changes would be

greater in the system with less cone opsin overall. If the colour task in this species were background matching, changes in lighting conditions would have a greater relative effect. Such effects could be affected by differential topographic distribution of cone opsins, a phenomenon known at the molecular level, among others, from work on cichlids and zebrafish (Dalton et al., 2015; Takechi and Kawamura, 2005). On a morphological level differential distribution of different photoreceptor classes is common in many animals, including many reef fish (Collin and Shand, 2003). Such differences are thought to relate directly to visual system demands and may be related to tasks specific for certain cone classes (e.g. background matching; Temple, 2011). Such a spatial differentiation of tasks may then result in differential distribution of opsins across the retina [like the human fovea that contains fewer blue sensitive cones (Curcio et al., 1991; Roorda and Williams, 1999)], and as a consequence, make these different retinal areas respond differently to altered light conditions.

## **Conclusion**

Increasing evidence suggests that gene expression plasticity seems to be crucial for sensory system adaptation to environmental conditions. Our study shows that retinal opsin expression in adult reef fish is plastic, and that it can be modulated by spectral and intensity changes in environmental light. Such expression adjustments may allow rapid adaptation to changing light conditions in the wild, due to changed habitat depth or seasonal variability. Our results largely concur with previous reports on opsin gene expression plasticity in fish; however, the effects observed here differ between species and opsin gene class, suggesting that interactions of this nature need to be assessed at the species level.

## **Data accessibility**

New opsin gene sequences have been deposited in the GenBank database, and accession numbers are given in Figure 1. Primer sequences are made available in Table S2.

## **Acknowledgments**

We would like to thank Fabio Cortesi for providing advice on RNAseq analyses, Cairns Marine for sourcing and supplying fish, and the staff at Lizard Island Research Station for support during field work. Furthermore, we thank Janette Edson, QBI Genomics Facility, for preparing the libraries and running the RNAseq, and the Mowry lab (QBI) for kindly providing the StepOnePlus Real-Time PCR System. This work was supported by an Australian Research Council Discovery Project (DP150102710) awarded to KLC and JM, and the AFOSR/AOARD to JM.

## **Author contributions**

SMS, ML, KLC, KLC and JM designed the study. SMS, ML, and AP performed the experiments. SMS, ML and KLC analyzed the data. ML and SMS wrote the initial manuscript. All authors contributed to writing the manuscript and approved the final version.

## Literature cited

- Afgan, E., Sloggett, C., Goonasekera, N., Makunin, I., Benson, D., Crowe, M., Gladman, S., Kowsar, Y., Pheasant, M., Horst, R., et al.** (2015). Genomics Virtual Laboratory: A practical bioinformatics workbench for the cloud. *PLoS One* **10**, e0140829.
- Allen, G.R.** (1991) *Damselfishes of the World*. Mergus, Melle, Germany.
- Allen, G. R., Steene, R. C., Humann, P. and Deloach, N.** (2003). *Reef Fish Identification - Tropical Pacific*. 1st ed. Jacksonville, Fla.: New World Publications.
- Archer, S., Hope, A. and Partridge, J. C.** (1995). The molecular basis for the green-blue sensitivity shift in the rod visual pigments of the European eel. *Proc. R. Soc. B Biol. Sci.* **262**, 289–295.
- Barnett, A., Bellwood, D. R. and Hoey, A. S.** (2006). Trophic ecomorphology of cardinalfish. *Mar. Ecol. Prog. Ser.* **322**, 249–257.
- Beatty, D. D.** (1966). A study of the succession of visual pigments in Pacific salmon (*Oncorhynchus*). *Can. J. Zool.* **44**, 429–455.
- Beatty, D. D.** (1975). Visual pigments of the american eel *Anguilla rostrata*. *Vision Res.* **15**, 771–776.
- Beatty, D. D.** (1984). Visual pigments and the labile scotopic visual system of fish. *Vision Res.* **24**, 1563–1573.
- Bowmaker, J. K.** (2008). Evolution of vertebrate visual pigments. *Vision Res.* **48**, 2022–2041.
- Carleton, K.** (2009). Cichlid fish visual systems: mechanisms of spectral tuning. *Integr. Zool.* **4**, 75–86.
- Carleton, K. L. and Kocher, T. D.** (2001). Cone opsin genes of African cichlid fishes: tuning spectral sensitivity by differential gene expression. *Mol. Biol. Evol.* **18**, 1540–1550.
- Carleton, K. L., Spady, T. C., Streelman, J. T., Kidd, M. R., McFarland, W. N. and Loew, E.**

- R.** (2008). Visual sensitivities tuned by heterochronic shifts in opsin gene expression. *BMC Biol.* **6**,.
- Carleton, K. L., Dalton, B. E., Escobar-Camacho, D. and Nandamuri, S. P.** (2016). Proximate and ultimate causes of variable visual sensitivities: Insights from cichlid fish radiations. *Genesis* **00**, 1–27.
- Cheng, C. L. and Novales Flamarique, I.** (2004). Opsin expression: New mechanism for modulating colour vision. *Nature* **428**, 279–279.
- Chiao, C. C., Vorobyev, M., Cronin, T. W. and Osorio, D.** (2000). Spectral tuning of dichromats to natural scenes. *Vision Res.* **40**, 3257–3271.
- Collin, S. P. and Shand, J.** (2003). Retinal sampling and the visual field in fishes. In *Sensory Processing in Aquatic Environments* (ed. Collin, S. P.) and Marshall, J. N.), pp. 139–169. New York: Springer.
- Cortesi, F., Musilová, Z., Stieb, S. M., Hart, N. S., Siebeck, U. E., Malmstrøm, M., Tørresen, O. K., Jentoft, S., Cheney, K. L., Marshall, N. J., et al.** (2015a). Ancestral duplications and highly dynamic opsin gene evolution in percomorph fishes. *Proc. Natl. Acad. Sci. U. S. A.* **112**, 1493–1498.
- Cortesi, F., Feeney, W. E., Ferrari, M. C. O., Waldie, P. A., Phillips, G. A. C., McClure, E. C., Sköld, H. N., Salzburger, W., Marshall, N. J. and Cheney, K. L.** (2015b). Phenotypic plasticity confers multiple fitness benefits to a mimic. *Curr. Biol.* **25**, 949–954.
- Cottrill, P. B., Davies, W. L., Semo, M., Bowmaker, J. K., Hunt, D. M. and Jeffery, G.** (2009). Developmental dynamics of cone photoreceptors in the eel. *BMC Dev. Biol.* **9**, 71.
- Cribari-Neto, F. and Zeileis, A.** (2009). Beta regression in R. *J. Stat. Softw.* **34**, 269–288.
- Cronin, T. W., Johnsen, S., Marshall, J. N. and Warrant, E.** (2014). *Visual Ecology*. (ed. Cronin, T. W.), Johnsen, S.), Marshall, J. N.), and Warrant, E.) Princeton, NJ: Princeton University Press.
- Cronly-Dillon, J., Sharma, S. C., Iersel, V. and Iersel, V.** (1968). Effect of season and sex on the

photopic spectral sensitivity of the Three-spined stickleback. *J. Exp. Biol.* **49**, 679–687.

**Curcio, C. A., Allen, K. A., Sloan, K. R., Lerea, C. L., Hurley, J. B., Klock, I. B. and Milam, A.**

**H.** (1991). Distribution and morphology of human cone photoreceptors stained with anti-blue opsin. *J. Comp. Neurol.* **312**, 610–624.

**Dalton, B. E., Loew, E. R., Cronin, T. W. and Carleton, K. L.** (2014). Spectral tuning by opsin coexpression in retinal regions that view different parts of the visual field. *Proc. R. Soc. B Biol. Sci.* **281**, 20141980.

**Dalton, B. E., Lu, J., Leips, J., Cronin, T. W. and Carleton, K. L.** (2015). Variable light environments induce plastic spectral tuning by regional opsin coexpression in the African cichlid fish, *Metriaclima zebra*. *Mol. Ecol.* **24**, 4193–4204.

**Dalton, B. E., de Busserolles, F., Marshall, N. J. and Carleton, K. L.** (2017). Retinal specialization through spatially varying cell densities and opsin coexpression in cichlid fish. *J. Exp. Biol.* **220**, 266–277.

**de Busserolles, F. and Marshall, N. J.** (2017). Seeing in the deep-sea: visual adaptations in lanternfishes. *Philos. Trans. R. Soc. B Biol. Sci.* **372**, 20160070.

**de Busserolles, F., Fitzpatrick, J. L., Marshall, N. J. and Collin, S. P.** (2014). The influence of photoreceptor size and distribution on optical sensitivity in the eyes of lanternfishes (Myctophidae). *PLoS One* **9**, e99957.

**de Busserolles, F., Hart, N. S., Hunt, D. M., Davies, W. I., Marshall, N. J., Clarke, M. W., Hahne, D. and Collin, S. P.** (2015). Spectral tuning in the eyes of deep-sea lanternfishes (Myctophidae): A novel sexually dimorphic intra-ocular filter. *Brain. Behav. Evol.* **85**, 77–93.

**de Busserolles, F., Cortesi, F., Helvik, J. V., Davies, W. I. L., Templin, R. M., Sullivan, R. K. P., Michell, C. T., Mountford, J. K., Collin, S. P., Irigoien, X., et al.** (2017). Pushing the limits of photoreception in twilight conditions: The rod-like cone retina of the deep-sea pearlsides. *Sci. Adv.* **3**, eaao4709.

**Detto, T.** (2007). The fiddler crab *Uca mjoebergi* uses colour vision in mate choice. *Proc. R. Soc. B*



*Biol. Sci.* **274**, 2785–2790.

**Dungan, S. Z., Kosyakov, A. and Chang, B. S. W.** (2016). Spectral tuning of killer whale (*Orcinus orca*) rhodopsin: Evidence for positive selection and functional adaptation in a cetacean visual pigment. *Mol. Biol. Evol.* **33**, 323–336.

**Ehlman, S. M., Sandkam, B. A., Breden, F. and Sih, A.** (2015). Developmental plasticity in vision and behavior may help guppies overcome increased turbidity. *J. Comp. Physiol. A Neuroethol. Sensory, Neural, Behav. Physiol.* **201**, 1125–1135.

**Emery, A. R.** (1973). Comparative ecology and functional osteology of fourteen species of damselfish (Pisces: Pomacentridae) at Alligator Reef, Florida Keys. *Bull. Mar. Sci.* **23**, 649–770.

**Foote, C. J., Brown, G. S. and Hawryshyn, C. W.** (2004). Female colour and male choice in sockeye salmon: Implications for the phenotypic convergence of anadromous and nonanadromous morphs. *Anim. Behav.* **67**, 69–83.

**Fuller, R. C. and Claricoates, K. M.** (2011). Rapid light-induced shifts in opsin expression: Finding new opsins, discerning mechanisms of change, and implications for visual sensitivity. *Mol. Ecol.* **20**, 3321–3335.

**Fuller, R. C. and Travis, J.** (2004). Genetics, lighting environment, and heritable responses to lighting environment affect male color morph expression in bluefin killifish, *Lucania goodei*. *Evolution (N. Y.)* **58**, 1086–1098.

**Fuller, R. C., Carleton, K. L., Fadool, J. M., Spady, T. C. and Travis, J.** (2004). Population variation in opsin expression in the bluefin killifish, *Lucania goodei*: a real-time PCR study. *J. Comp. Physiol. A Neuroethol. Sens. Neural. Behav. Physiol.* **190**, 147–154.

**Fuller, R. C., Carleton, K. L., Fadool, J. M., Spady, T. C. and Travis, J.** (2005). Genetic and environmental variation in the visual properties of bluefin killifish, *Lucania goodei*. *J. Evol. Biol.* **18**, 516–523.

**Fuller, R. C., Noa, L. A. and Strellner, R. S.** (2010). Teasing apart the many effects of lighting

environment on opsin expression and foraging preference in Bluefin killifish. *Am. Nat.* **176**, 1–13.

**Gardiner, N.** (2010). *Habitat specialisation, niche overlap and site fidelity in a vulnerable family of coral reef fishes - the cardinalfish (Apogonidae)*. Dissertation, Townsville: James Cook University.

**Gardiner, N. M. and Jones, G. P.** (2005). Habitat specialisation and overlap in a guild of coral reef cardinalfishes (Apogonidae). *Mar. Ecol. Prog. Ser.* **305**, 163–175.

**Gegenfurtner, K. R. and Kiper, D. C.** (2003). Color vision. *Annu. Rev. Neurosci.* **26**, 181–206.

**Govardovskii, V. I., Fyhrquist, N., Reuter, T., Kuzmin, D. G. and Donner, K.** (2000). In search of the visual pigment template. *Vis. Neurosci.* **17**, 509–528.

**Hauser, F. E. and Chang, B. S.** (2017). Insights into visual pigment adaptation and diversity from model ecological and evolutionary systems. *Curr. Opin. Genet. Dev.* **47**, 110–120.

**Hawryshyn, C. W., Moyer, H. D., Allison, W. T., Haimberger, T. J. and McFarland, W. N.** (2003). Multidimensional polarization sensitivity in damselfishes. *J. Comp. Physiol. A. Neuroethol. Sens. Neural. Behav. Physiol.* **189**, 213–220.

**Hofmann, C. M., O'Quin, K. E., Smith, A. R. and Carleton, K. L.** (2010). Plasticity of opsin gene expression in cichlids from Lake Malawi. *Mol. Ecol.* **19**, 2064–2074.

**Hofmann, C. M., Marshall, N. J., Abdilleh, K., Patel, Z., Siebeck, U. E. and Carleton, K. L.** (2012). Opsin evolution in damselfish: Convergence, reversal, and parallel evolution across tuning sites. *J. Mol. Evol.* **75**, 79–91.

**Hunt, D. M., Dulai, K. S., Partridge, J. C., Cottrill, P. and Bowmaker, J. K.** (2001). The molecular basis for spectral tuning of rod visual pigments in deep-sea fish. *J. Exp. Biol.* **204**, 3333–3344.

**Hunt, D. M., Collin, S. P., Hankins, M. W., Collin, S. P. and Marshall, N. J.** (2014). *Evolution of visual and non-visual pigments*. (ed. Hunt, D. M., Hankins, M. W., Collin, S. P.), and Marshall, N. J.) Boston, MA: Springer US.

- Jerlov, N. G.** (1977). Classification of sea water in terms of quanta irradiance. *ICES J. Mar. Sci.* **37**, 281–287.
- Korenbrot, J. I. and Fernald, R. D.** (1989). Circadian rhythm and light regulate opsin mRNA in rod photoreceptors. *Nature* **337**, 454–457.
- Kröger, R. H. H., Bowmaker, J. K. and Wagner, H. J.** (1999). Morphological changes in the retina of *Aequidens pulcher* (Cichlidae) after rearing in monochromatic light. *Vision Res.* **39**, 2441–2448.
- Kröger, R. H. H., Knoblauch, B. and Wagner, H. J.** (2003). Rearing in different photic and spectral environments changes the optomotor response to chromatic stimuli in the cichlid fish *Aequidens pulcher*. *J. Exp. Biol.* **206**, 1643–1648.
- Kuwamura, T.** (1985). Social and reproductive behavior of three mouthbrooding cardinalfishes, *Apogon doederleini*, *A. niger* and *A. notatus*. *Environ. Biol. Fishes* **13**, 17–24.
- Leis, J. M.** (1991). The pelagic stage of reef fishes: the larval biology of coral reef fishes. In *The ecology of fishes on coral reefs*, pp. 183–230. Academic Press, Inc.
- Lim, J., Chang, J. L. and Tsai, H. J.** (1997). A second type of rod opsin cDNA from the common carp (*Cyprinus carpio*). *Biochim. Biophys. Acta - Gene Struct. Expr.* **1352**, 8–12.
- Loew, E. R. and Lythgoe, J. N.** (1978). The ecology of cone pigments in teleost fishes. *Vision Res.* **18**, 715–722.
- Loew, E. R. and McFarland, W. N.** (1990). The underwater visual environment. In *The Visual System of Fish* (ed. Douglas, R. H.) and Djamgoz, M. B. A.), pp. 1–43. Dordrecht: Springer Netherlands.
- Loew, E. R., McFarland, W. N. and Margulies, D.** (2002). Developmental changes in the visual pigments of the yellowfin tuna, *Thunnus albacares*. *Mar. Freshw. Behav. Physiol.* **35**, 235–246.
- Losey, G. S., McFarland, W. N., Loew, E. R., Zamzow, J. P., Nelson, P. A. and Marshall, N. J.** (2003). Visual biology of Hawaiian coral reef fishes. I. Ocular transmission and visual

pigments. *Copeia* **2003**, 433–454.

**Lythgoe, J. N.** (1979). *Ecology of vision*. (ed. Lythgoe, J. N.) Oxford, UK: Oxford University Press.

**Marnane, M.** (2000). Site fidelity and homing behaviour in coral reef cardinalfishes. *J. Fish Biol.* **57**, 1590–1600.

**Marnane, M. J. and Bellwood, D. R.** (2002). Diet and nocturnal foraging in cardinalfishes (Apogonidae) at One Tree Reef, Great Barrier Reef, Australia. *Mar. Ecol. Prog. Ser.* **231**, 261–268.

**Marshall, N. J.** (2000). The visual ecology of reef fish colours. In *Animal Signals: Signaling and Signal Designs in Animal Communication* (ed. Espmark, Y., Amundsen, T.), and Rosenqvist, G.), pp. 83–120. Tapir, Trondheim, Norway: Tapir Academic Press.

**Marshall, N. J., Jennings, K., McFarland, W. N., Loew, E. R. and Losey, G. S.** (2003). Visual biology of Hawaiian coral reef fishes. III. Environmental light and an integrated approach to the ecology of reef fish vision. *Copeia* **2003**, 467–480.

**Marshall, J., Vorobyev, M. and Siebeck, U. E.** (2006). What does a reef fish see when it sees a reef fish? In *Communication in Fishes* (ed. Kapoor B. G.), Ladich, F.), Collin, S. P.), and Moller, P.), pp. 393–422. Enfield (NH) and Plymouth (UK): Science Publishers.

**Marshall, J., Carleton, K. L. and Cronin, T.** (2015). Colour vision in marine organisms. *Curr. Opin. Neurobiol.* **34C**, 86–94.

**Matsumoto, Y., Fukamachi, S., Mitani, H. and Kawamura, S.** (2006). Functional characterization of visual opsin repertoire in Medaka (*Oryzias latipes*). *Gene* **371**, 268–278.

**Matz, M. V, Marshall, N. J. and Vorobyev, M.** (2006). Are corals colorful? *Photochem. Photobiol.* **82**, 345–350.

**McClanahan, T.** (1988). Seasonality in East Africa's coastal waters. *Mar. Ecol. Prog. Ser.* **44**, 191–199.

**McFarland, W.** (1990). Light in the sea - the optical world of elasmobranchs. *J. Exp. Zool.* **12**, 3–

12.

- McFarland, W. N. and Loew, E. R.** (1994). Ultraviolet visual pigments in marine fishes of the family Pomacentridae. *Vision Res.* **34**, 1393–1396.
- McLeod, A. I.** (2005). Kendall rank correlation and Mann-Kendall trend test. *R Packag. Kendall* 1–10.
- Miller, M. A., Pfeiffer, W. and Schwartz, T.** (2010). Creating the CIPRES Science Gateway for inference of large phylogenetic trees. In *2010 Gateway Computing Environments Workshop (GCE)*, pp. 1–8. IEEE.
- Miyagi, R., Terai, Y., Aibara, M., Sugawara, T., Imai, H., Tachida, H., Mzighani, S. I., Okitsu, T., Wada, A. and Okada, N.** (2012). Correlation between nuptial colors and visual sensitivities tuned by opsins leads to species richness in sympatric Lake Victoria cichlid fishes. *Mol. Biol. Evol.* **29**, 3281–3296.
- Morrow, J. M., Lazic, S., Dixon Fox, M., Kuo, C., Schott, R. K., de A. Gutierrez, E., Santini, F., Tropepe, V. and Chang, B. S. W.** (2017). A second visual rhodopsin gene, *rh1-2*, is expressed in zebrafish photoreceptors and found in other ray-finned fishes. *J. Exp. Biol.* **220**, 294–303.
- Munz, F. W. and McFarland, W. N.** (1977). Evolutionary adaptations of fishes to the photic environment. In *The visual system in vertebrates* (ed. Crescitelli, F.), pp. 193–274. Springer, Berlin, Heidelberg.
- Nandamuri, S. P., Yourick, M. R. and Carleton, K. L.** (2017). Adult plasticity in African cichlids: Rapid changes in opsin expression in response to environmental light differences. *Mol. Ecol.* **26**, 6036–6052.
- Partridge, J. C., Archer, S. N. and Vanostrum, J.** (1992). Single and multiple visual pigments in deep-sea fishes. *J. Mar. Biol. Ass. U.K.* **72**, 113–130.
- Petersen, C. W.** (1995). Male mating success and female choice in permanently territorial damselfishes. *Bull. Mar. Sci.* **57**, 690–704.

- Phillips, G. A. C., Carleton, K. L. and Marshall, N. J.** (2016). Multiple genetic mechanisms contribute to visual sensitivity variation in the labridae. *Mol. Biol. Evol.* **33**, 201–215.
- Pointer, M. A., Carvalho, L. S., Cowing, J. A., Bowmaker, J. K. and Hunt, D. M.** (2007). The visual pigments of a deep-sea teleost, the pearl eye *Scopelarchus analis*. *J. Exp. Biol.* **210**, 2829–2835.
- Price, T. D.** (2017). Sensory Drive, Color, and Color Vision. *Am. Nat.* **190**, 157–170.
- Randall, J. E., Allen, G. R. and Steene, R. C.** (1990). *Fishes of the Great Barrier Reef and Coral Sea*. Bathurst, NSW: Crawford House Press.
- Rick, I. P., Modarressie, R. and Bakker, T. C. M.** (2006). UV wavelengths affect female mate choice in three-spined sticklebacks. *Anim. Behav.* **71**, 307–313.
- Roorda, A. and Williams, D. R.** (1999). The arrangement of the three cone classes in the living human eye. *Nature* **397**, 520–522.
- Sakai, Y., Ohtsuki, H., Kasagi, S., Kawamura, S. and Kawata, M.** (2016). Effects of light environment during growth on the expression of cone opsin genes and behavioral spectral sensitivities in guppies (*Poecilia reticulata*). *BMC Evol. Biol.* **16**, 106.
- Sandkam, B., Young, C. M. and Breden, F.** (2015). Beauty in the eyes of the beholders: Colour vision is tuned to mate preference in the Trinidadian guppy (*Poecilia reticulata*). *Mol. Ecol.* **24**, 596–609.
- Seehausen, O., Terai, Y., Magalhaes, I. S., Carleton, K. L., Mrosso, H. D. J., Miyagi, R., van der Sluijs, I., Schneider, M. V, Maan, M. E., Tachida, H., et al.** (2008). Speciation through sensory drive in cichlid fish. *Nature* **455**, 620–626.
- Shand, J., Davies, W. L., Thomas, N., Balmer, L., Cowing, J. a, Pointer, M., Carvalho, L. S., Trezise, A. E. O., Collin, S. P., Beazley, L. D., et al.** (2008). The influence of ontogeny and light environment on the expression of visual pigment opsins in the retina of the black bream, *Acanthopagrus butcheri*. *J. Exp. Biol.* **211**, 1495–503.
- Siebeck, U. E. and Marshall, N. J.** (2001). Ocular media transmission of coral reef fish - Can coral

reef fish see ultraviolet light? *Vision Res.* **41**, 133–149.

**Siebeck, U. E., Wallis, G. M. and Litherland, L.** (2008). Colour vision in coral reef fish. *J. Exp. Biol.* **211**, 354–360.

**Spady, T. C., Parry, J. W. L., Robinson, P. R., Hunt, D. M., Bowmaker, J. K. and Carleton, K. L.** (2006). Evolution of the cichlid visual palette through ontogenetic subfunctionalization of the opsin gene arrays. *Mol. Biol. Evol.* **23**, 1538–1547.

**Stamatakis, A.** (2014). RAxML version 8: a tool for phylogenetic analysis and post-analysis of large phylogenies. *Bioinformatics* **30**, 1312–1313.

**Stieb, S. M., Carleton, K. L., Cortesi, F., Marshall, N. J. and Salzburger, W.** (2016). Depth-dependent plasticity in opsin gene expression varies between damselfish (Pomacentridae) species. *Mol. Ecol.* **25**, 3645–3661.

**Stieb, S. M., Cortesi, F., Sueess, L., Carleton, K. L., Salzburger, W. and Marshall, N. J.** (2017). Why UV vision and red vision are important for damselfish (Pomacentridae): structural and expression variation in opsin genes. *Mol. Ecol.* **26**, 1323–1342.

**Stuart-Fox, D. M., Moussalli, A., Marshall, N. J. and Owens, I. P. F.** (2003). Conspicuous males suffer higher predation risk: visual modelling and experimental evidence from lizards. *Anim. Behav.* **66**, 541–550.

**Takahashi, Y. and Ebrey, T. G.** (2003). Molecular basis of spectral tuning in the newt short wavelength sensitive visual pigment. *Biochemistry* **42**, 6025–6034.

**Takechi, M. and Kawamura, S.** (2005). Temporal and spatial changes in the expression pattern of multiple red and green subtype opsin genes during zebrafish development. *J. Exp. Biol.* **208**, 1337–1345.

**Taylor, S. M., Loew, E. R. and Grace, M. S.** (2015). Ontogenic retinal changes in three ecologically distinct elopomorph fishes (Elopomorpha:Teleostei) correlate with light environment and behavior. *Vis. Neurosci.* **32**, E005-E013.

**Temple, S. E.** (2011). Why different regions of the retina have different spectral sensitivities: A

review of mechanisms and functional significance of intraretinal variability in spectral sensitivity in vertebrates. *Vis. Neurosci.* **28**, 281–293.

- Temple, S. E., Plate, E. M., Ramsden, S., Haimberger, T. J., Roth, W.-M. and Hawryshyn, C. W.** (2006). Seasonal cycle in vitamin A1/A2-based visual pigment composition during the life history of coho salmon (*Oncorhynchus kisutch*). *J. Comp. Physiol. A* **192**, 301–313.
- Temple, S. E., Veldhoen, K. M., Phelan, J. T., Veldhoen, N. J. and Hawryshyn, C. W.** (2008). Ontogenetic changes in photoreceptor opsin gene expression in coho salmon (*Oncorhynchus kisutch*, Walbaum). *J. Exp. Biol.* **211**, 3879–3888.
- Torres-Dowdall, J., Pierotti, M. E. R., Härer, A., Karagic, N., Woltering, J. M., Henning, F., Elmer, K. R. and Meyer, A.** (2017). Rapid and parallel adaptive evolution of the visual system of neotropical Midas cichlid fishes. *Mol. Biol. Evol.* **34**, 2469–2485.
- Toyama, M., Hironaka, M., Yamahama, Y., Horiguchi, H., Tsukada, O., Uto, N., Ueno, Y., Tokunaga, F., Seno, K. and Hariyama, T.** (2008). Presence of rhodopsin and porphyropsin in the eyes of 164 fishes, representing marine, diadromous, coastal and freshwater species a qualitative and comparative study. *Photochem. Photobiol.* **84**, 996–1002.
- Victor, B. C.** (1991). Settlement strategies and biogeography of reef fishes. In *The ecology of fishes on coral reefs*, pp. 231–260. Academic Press, Inc.
- Wagner, H. J. and Kröger, R. H.** (2000). Effects of long-term spectral deprivation on the morphological organization of the outer retina of the blue acara (*Aequidens pulcher*). *Philos. Trans. R. Soc. Lond. B. Biol. Sci.* **355**, 1249–1252.
- Wagner, H. J. and Kröger, R. H. H.** (2005). Adaptive plasticity during the development of colour vision. *Prog. Retin. Eye Res.* **24**, 521–536.
- Wikler, K. C. and Rakic, P.** (1990). Distribution of photoreceptor subtypes in the retina of diurnal and nocturnal primates. *J. Neurosci.* **10**, 3390–3401.
- Wood, P., Partridge, J. C. and Grip, W. J.** (1992). Rod visual pigment changes in the elver of the eel *Anguilla anguilla* L. measured by microspectrophotometry. *J. Fish Biol.* **41**, 601–611.



**Yokoyama, S.** (2008). Evolution of dim-light and color vision pigments. *Annu. Rev. Genomics Hum. Genet.* **9**, 259–282.

**Yokoyama, S. and Yokoyama, R.** (1996). Adaptive evolution of photoreceptors and visual pigments in vertebrates. *Annu. Rev. Ecol. Syst.* **27**, 543–567.

**Yokoyama, S., Takenaka, N. and Blow, N.** (2007). A novel spectral tuning in the short wavelength-sensitive (SWS1 and SWS2) pigments of bluefin killifish (*Lucania goodei*). *Gene* **396**, 196–202.

Figures

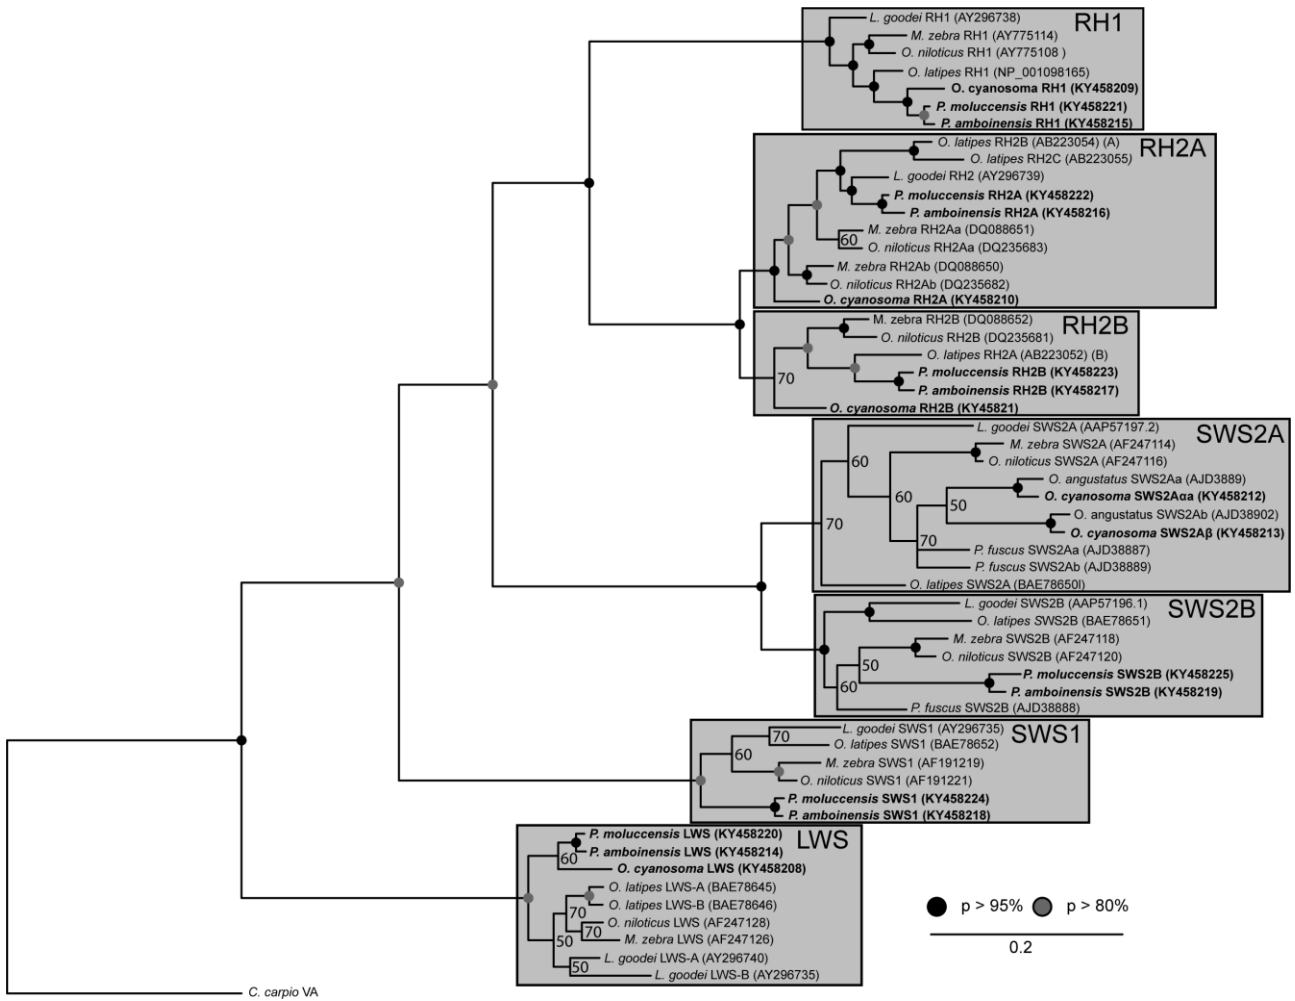

**Fig. 1** Maximum likelihood reconstruction of the phylogenetic relatedness of opsin gene sequences identified in *Ostorhinchus cyanosoma*, *Pomacentrus moluccensis*, and *P. amboinensis* (bold font). Genbank accession numbers of opsin genes are depicted.

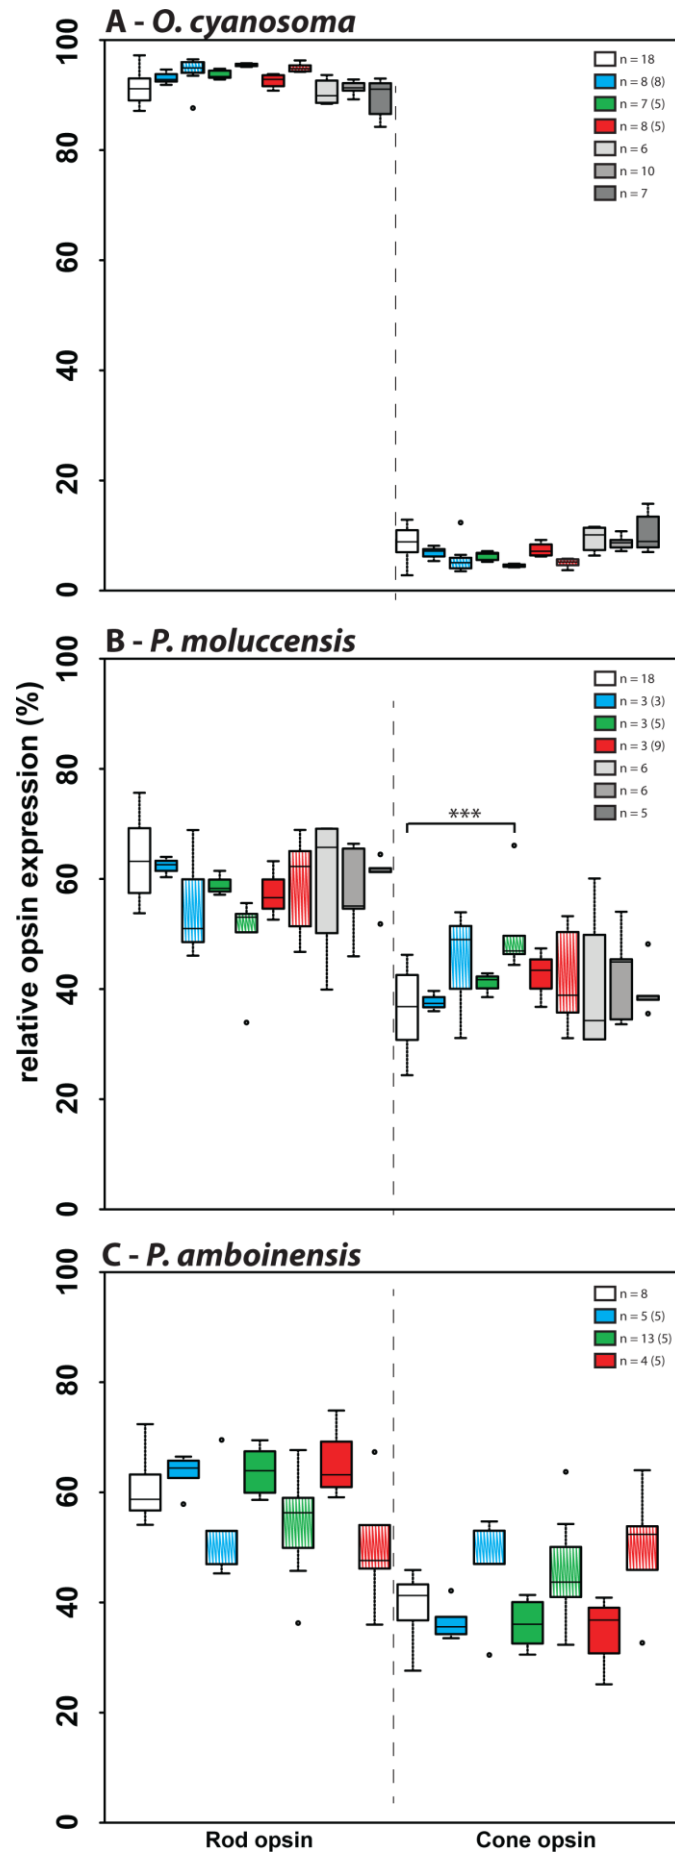

**Fig. 2** Relative expression of cone and rod opsin as a fraction of total opsin before (baseline) and after light treatments in (A) *Ostorhinchus cyanosoma*, (B) *Pomacentrus moluccensis*, (C) *P. amboinensis*. White – baseline; Blue – blue treatment; Green – green treatment; Red – red treatment; light grey – no filter treatment; medium grey – 0.15ND treatment; dark grey – 0.6ND treatment. Solid boxes – after 1 month; hatched boxes – after 4/6 months. Note that for *P. amboinensis* no intensity treatments are available. N indicates number of specimens used; number in parentheses indicates timepoint 2. Significance thresholds for beta regression: p-values less than or equal to 0.0083, 0.0017, and 0.00017 were considered significant and are marked with \*, \*\*, or \*\*\*, respectively.

Blue treatment

1 month

4 / 6 months

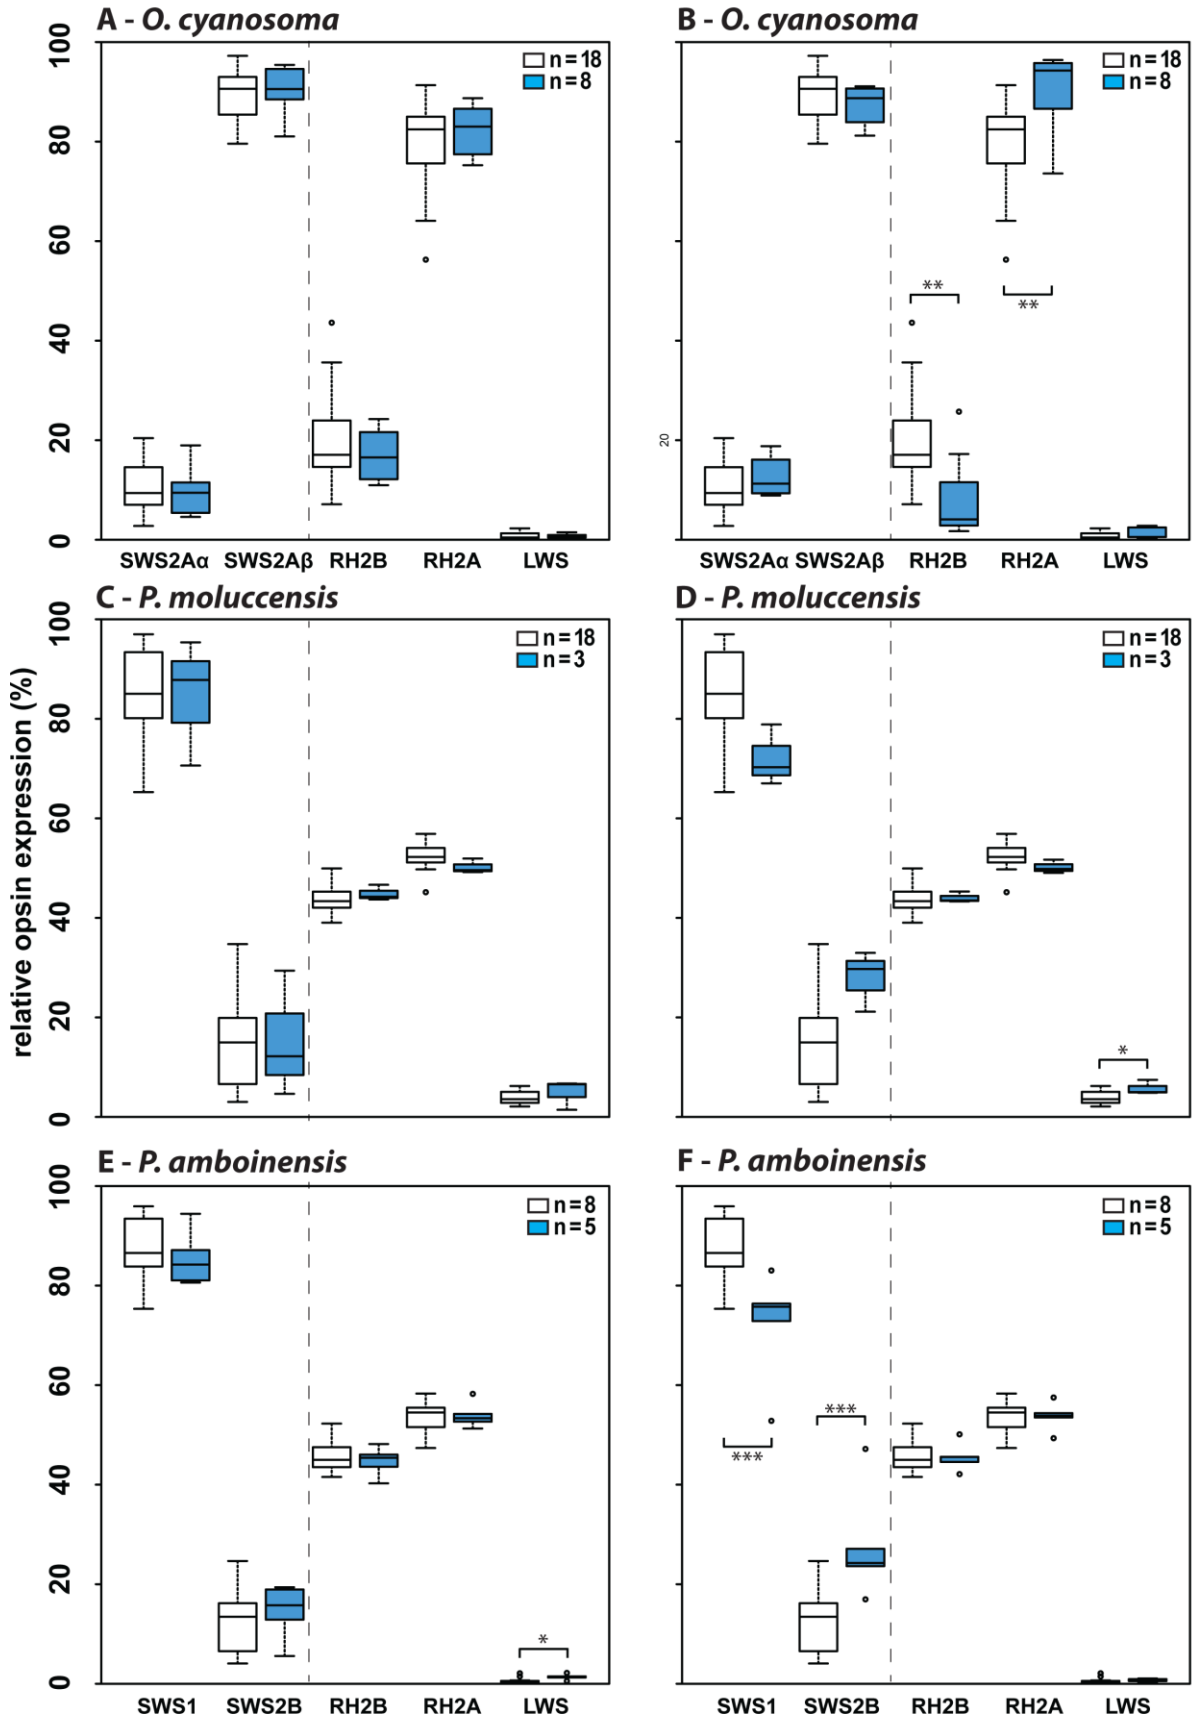

**Fig. 3** Relative cone opsin expression in *Ostorhinchus cyanosoma* (A and B), *Pomacentrus moluccensis* (C and D), and *P. amboinensis* (E and F) at the start of the experiment (baseline; white boxes) and after exposure to blue aquarium illumination for 1 and 4 (*O. cyanosoma*), respectively 6 months (*P. moluccensis*, *P. amboinensis*) (blue boxes). Expression values are shown as fraction of total single cone opsin [SWS2A $\alpha$ , SWS2A $\beta$  (A and B); SWS1, SWS2B (C – F)], or as fraction of total double cone opsin (RH2B, RH2A, LWS); dashed line marks separation. N indicates number of specimens used; number in parentheses indicates timepoint 2. Significance thresholds for beta regression: p-values less than or equal to 0.0083, 0.0017, and 0.00017 were considered significant and are marked with \*, \*\*, or \*\*\*, respectively.

Green treatment

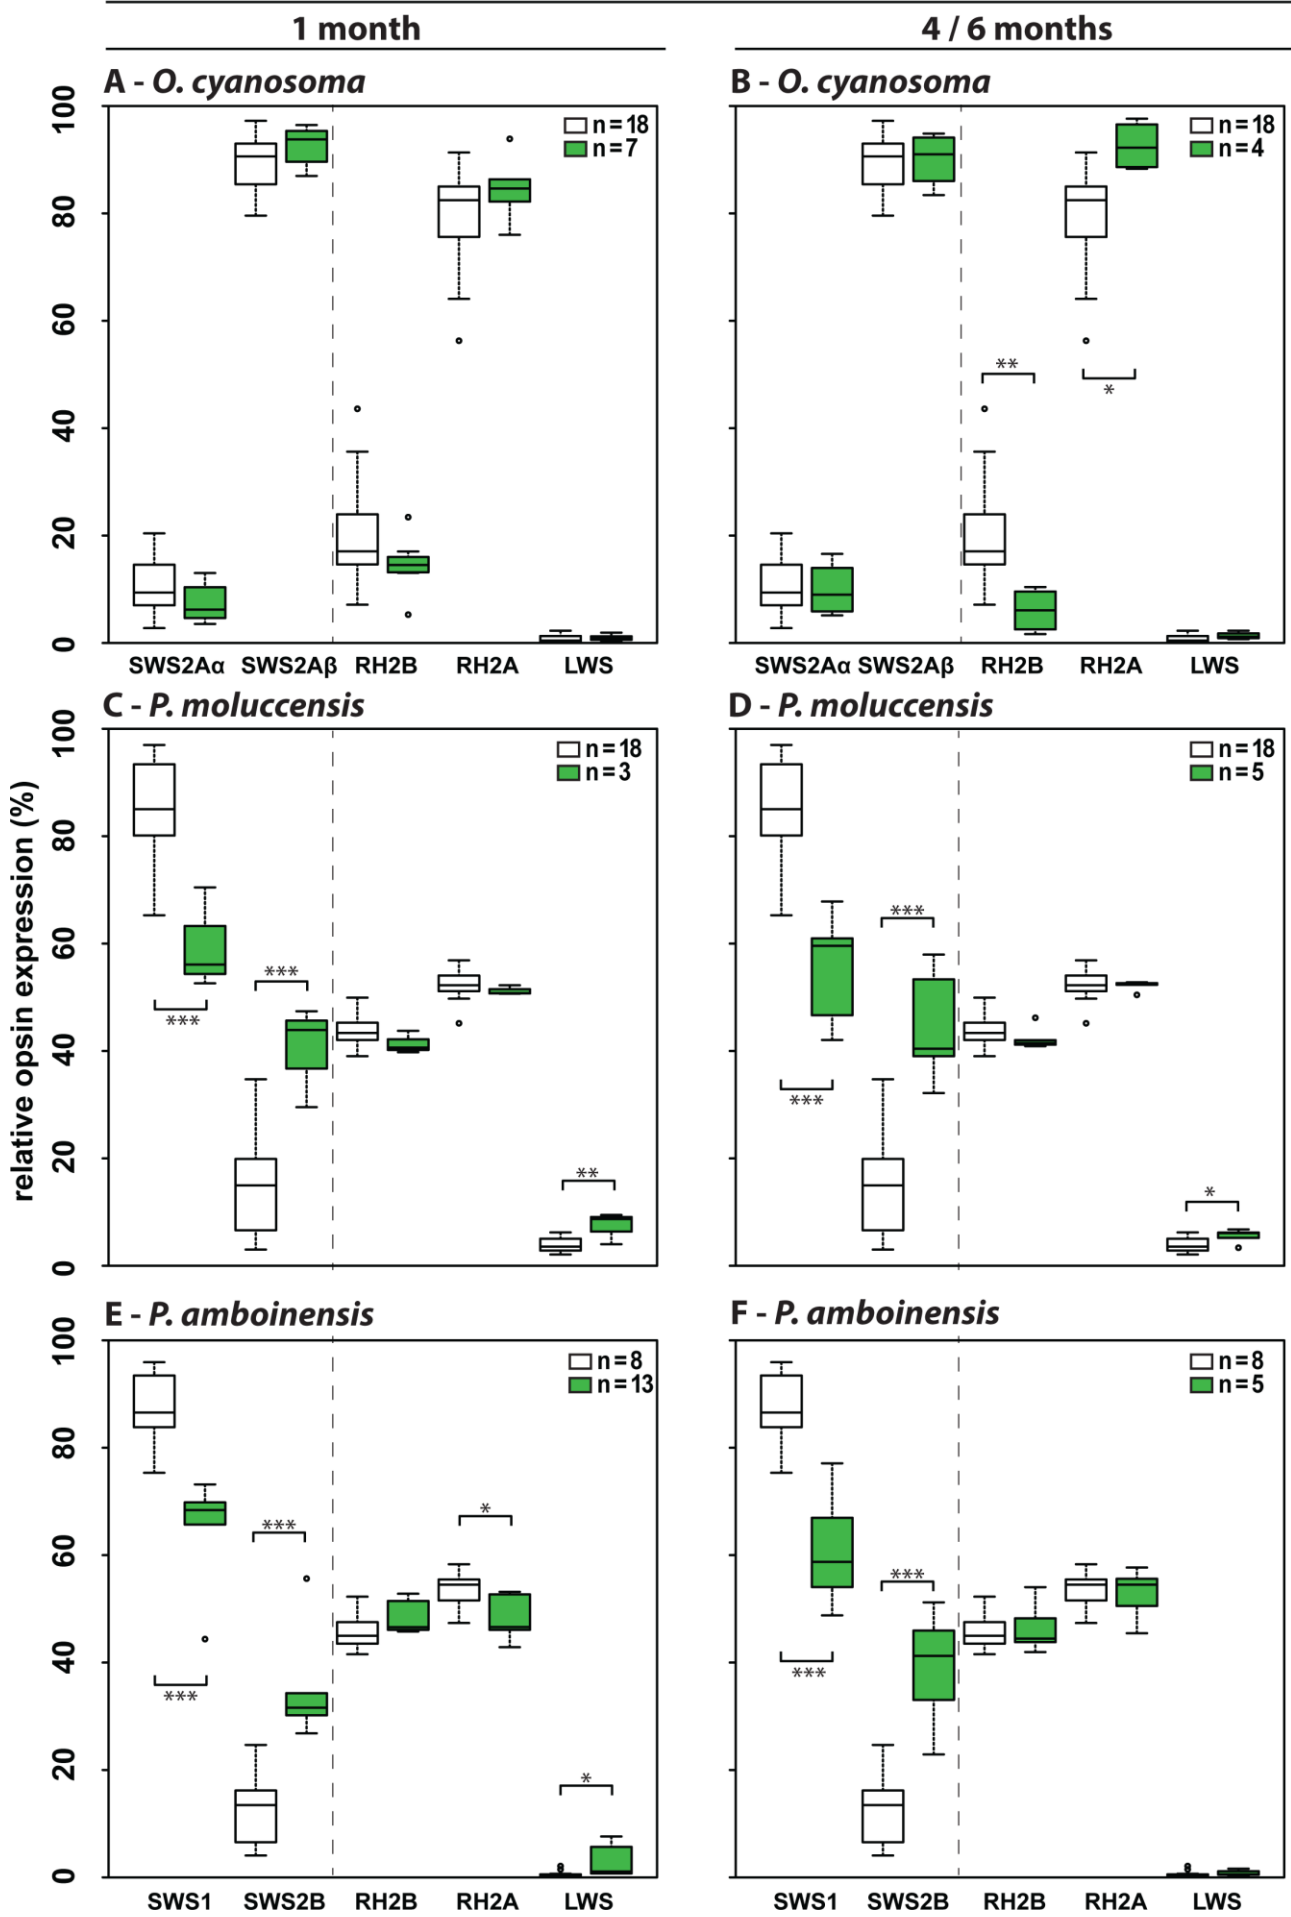

**Fig. 4** Relative cone opsin expression in *Ostorhinchus cyanosoma* (A and B), *Pomacentrus moluccensis* (C and D), and *P. amboinensis* (E and F) at the start of the experiment (baseline; white boxes) and after exposure to green aquarium illumination for 1 and 4 (*O. cyanosoma*), respectively 6 months (*P. moluccensis*, *P. amboinensis*) (green boxes). Expression values are shown as fraction of total single cone opsin [SWS2A $\alpha$ , SWS2A $\beta$  (A and B); SWS1, SWS2B (C – F)], or as fraction of total double cone opsin (RH2B, RH2A, LWS); dashed line marks separation. N indicates number of specimens used; number in parentheses indicates timepoint 2. Significance thresholds for beta regression: p-values less than or equal to 0.0083, 0.0017, and 0.00017 were considered significant and are marked with \*, \*\*, or \*\*\*, respectively.



Red treatment

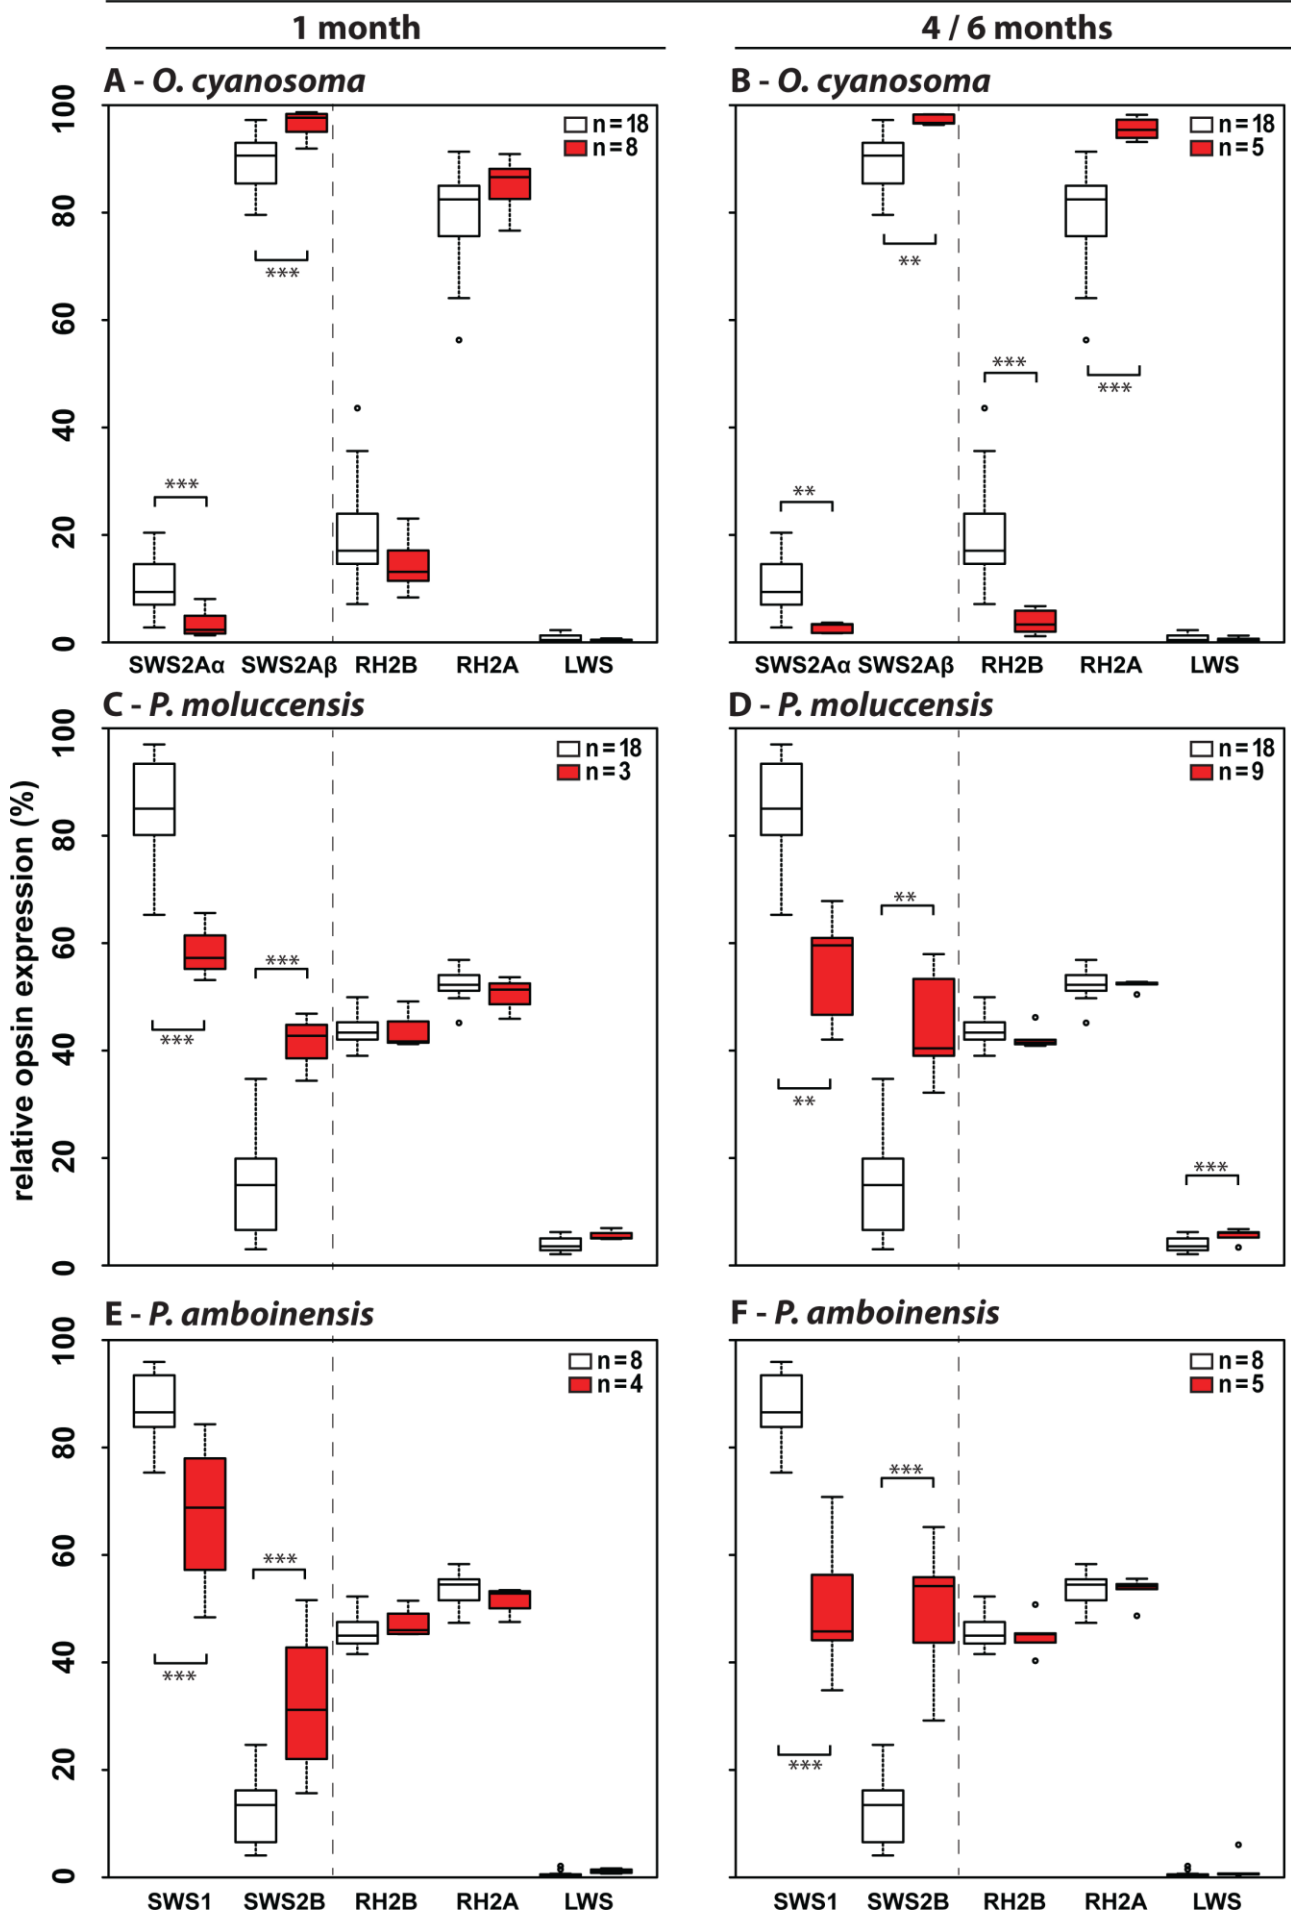

**Fig. 5** Relative cone opsin expression in *Ostorhinchus cyanosoma* (A and B), *Pomacentrus moluccensis* (C and D), and *P. amboinensis* (E and F) at the start of the experiment (baseline; white boxes) and after exposure to red aquarium illumination for 1 and 4 (*O. cyanosoma*), respectively 6 months (*P. moluccensis*, *P. amboinensis*) (red boxes). Expression values are shown as fraction of total single cone opsin [SWS2A $\alpha$ , SWS2A $\beta$  (A and B); SWS1, SWS2B (C – F)], or as fraction of total double cone opsin (RH2B, RH2A, LWS); dashed line marks separation. N indicates number of specimens used; number in parentheses indicates timepoint 2. Significance thresholds for beta regression: p-values less than or equal to 0.0083, 0.0017, and 0.00017 were considered significant and are marked with \*, \*\*, or \*\*\*, respectively.

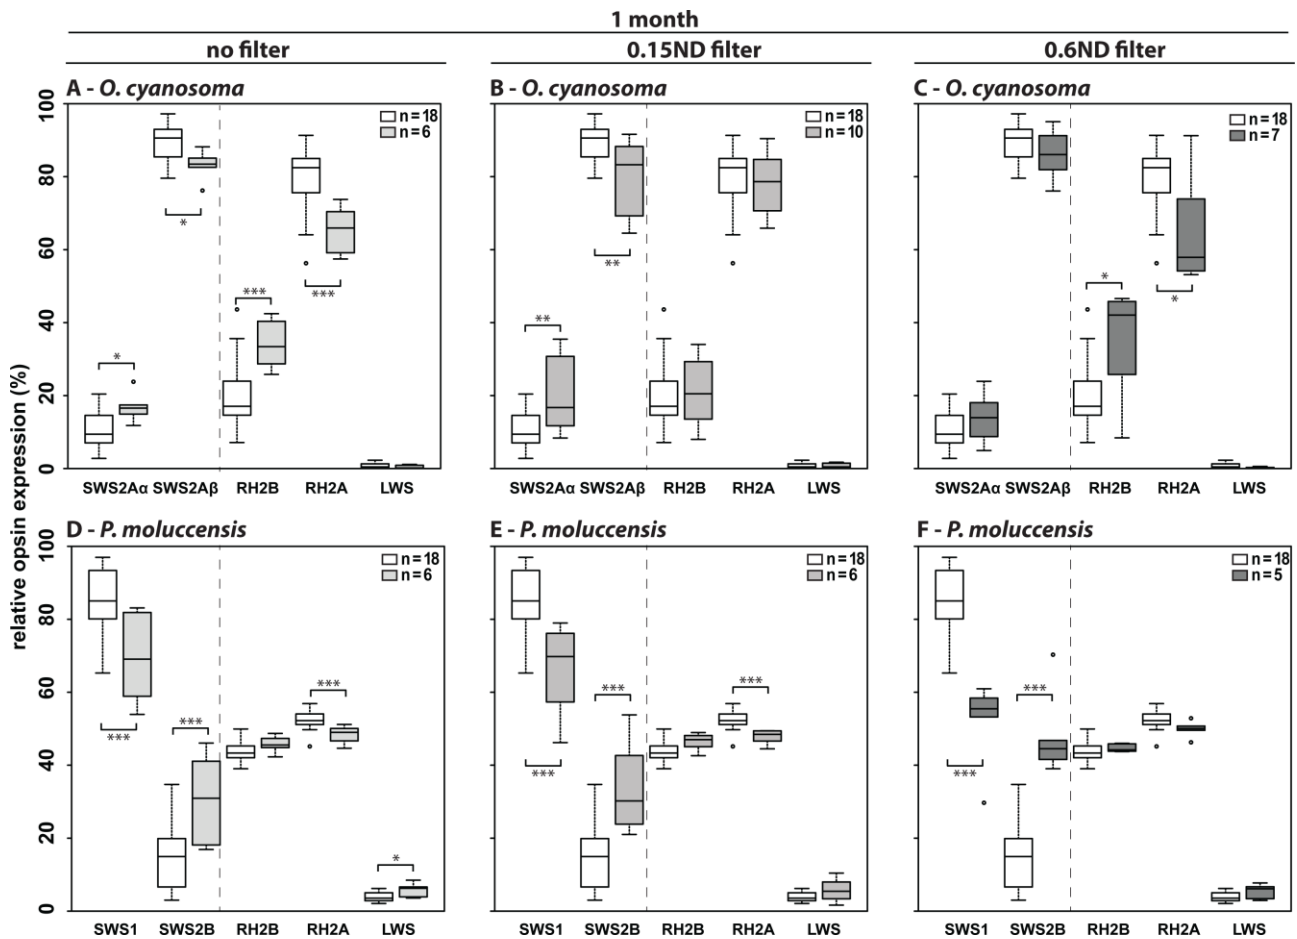

**Fig. 6** Relative cone opsin expression in *Ostorhinchus cyanosoma* (A - C), and *Pomacentrus moluccensis* (D - F) at the start of the experiment (baseline; white boxes) and after 1 month exposure to unfiltered aquarium light (A and D; light grey boxes), 0.15ND filtered aquarium light (B and E; medium grey boxes), and 0.6ND filtered aquarium light (C and F; dark grey boxes). Expression values are shown as fraction of total single cone opsin [SWS2A $\alpha$ , SWS2A $\beta$  (A - C); SWS1, SWS2B (D - F)], or as fraction of total double cone opsin (RH2B, RH2A, LWS); dashed line marks separation. N indicates number of specimens used; number in parentheses indicates timepoint 2. Significance thresholds for beta regression: p-values less than or equal to 0.0083, 0.0017, and 0.00017 were considered significant and are marked with \*, \*\*, or \*\*\*, respectively.

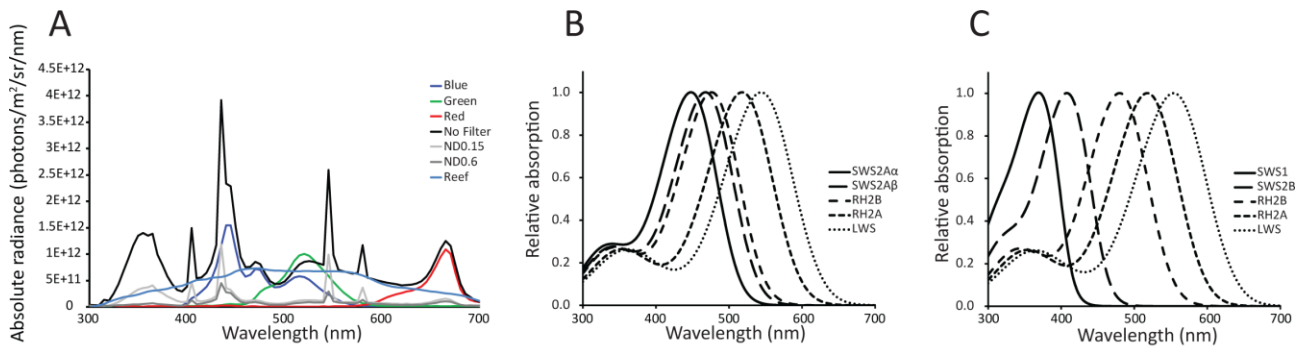

Blue Green Red Reef No-filter 0.15ND 0.6ND

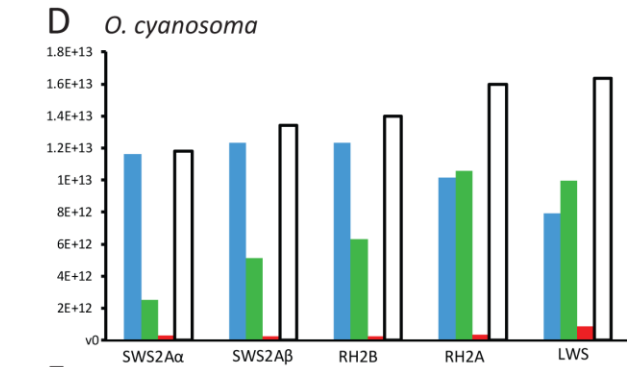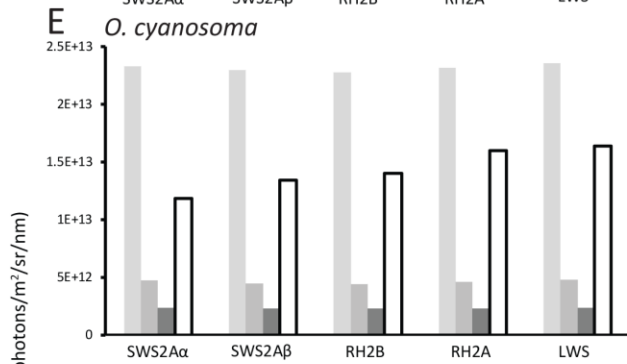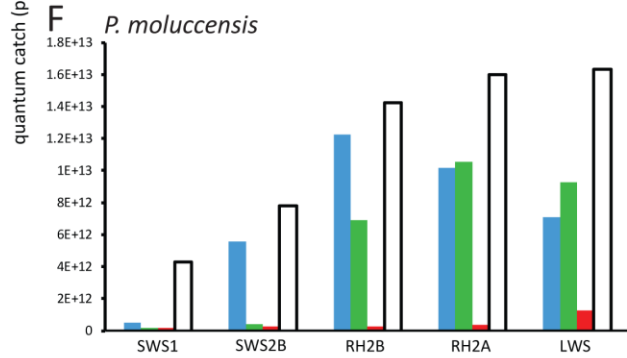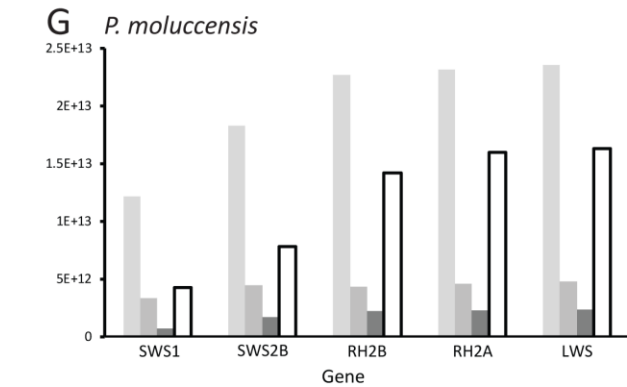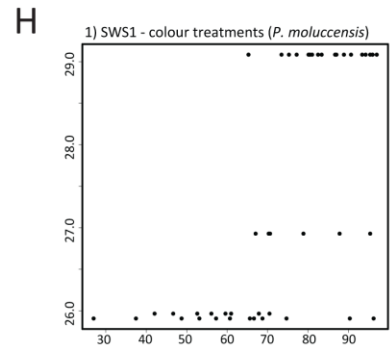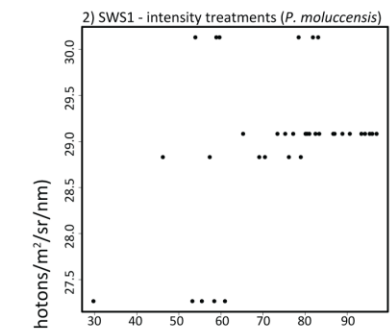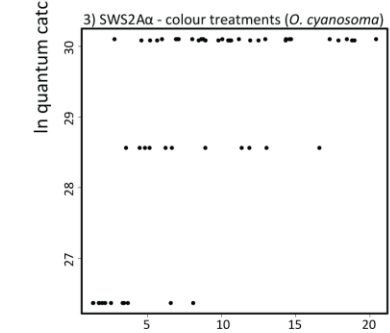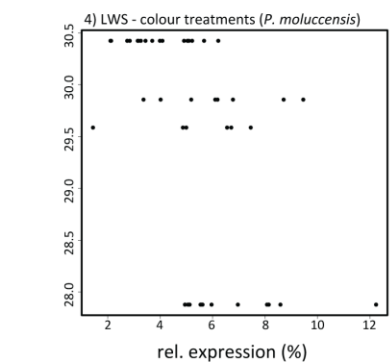

**Fig. 7** (A) Absolute radiance on a shallow water reef (reef), unfiltered laboratory light (no filter), colour (blue, green, red) and intensity (0.15ND, 0.6ND) treatments. (B and C) Spectral absorbance curves of photopigments based on modelled  $\lambda_{\max}$  values of photopigments categorized by identified opsin classes in *Ostorhinchus cyanosoma* (B), and in *Pomacentrus moluccensis* and *P. amboinensis* (C). (D – G) Absolute quantum catch of modelled photopigments containing one of the identified cone opsins each under reef illumination compared to colour and intensity treatments: *O. cyanosoma*, colour (D) and intensity (E) treatments; *P. moluccensis*, colour (F) and intensity (G) treatments. (H) Quantum catch plotted over relative expression of opsins showing plastic expression changes: *SWS1* quantum catch under colour (1) and intensity (2) treatments in *P. moluccensis*; *SWS2A $\alpha$*  (3) and *LWS* (4) quantum catch under colour treatments in *O. cyanosoma*.

**Table 1:** Summary of  $\lambda_{\max}$ -values for *Pomacentrus moluccensis*, *P. amboinensis*, and *Ostorhinchus cyanosoma*, comprising our modelling and MSP for reference.

| Species               | Gene           | modelling [nm] | MSP [nm] (same species)                    | MSP [nm] (related species)                                                               |
|-----------------------|----------------|----------------|--------------------------------------------|------------------------------------------------------------------------------------------|
| <i>P. moluccensis</i> | SWS1           |                | 370 ( <i>P. amboinensis</i> ) <sup>1</sup> | 347 - 376 (Pomacentridae) <sup>1-4</sup>                                                 |
|                       | SWS2B          | 408            |                                            | 404 ( <i>Chromis ovalis</i> ) <sup>2</sup> , 410 ( <i>Chromis verater</i> ) <sup>2</sup> |
|                       | RH2B           | 480            | 480 ( <i>P. amboinensis</i> ) <sup>1</sup> | 475 - 486 (Pomacentridae) <sup>1-5</sup>                                                 |
|                       | RH2A           | 518            | 523 ( <i>P. amboinensis</i> ) <sup>1</sup> | 519 (Pomacentridae) <sup>1-4</sup>                                                       |
|                       | LWS            | 554            |                                            | 560 ( <i>P. melanochir</i> ) <sup>5</sup>                                                |
| <i>O. cyanosoma</i>   | SWS2A $\alpha$ | 448            |                                            | 448 ( <i>P. fuscus</i> ) <sup>6</sup> , 441 ( <i>P. kallopterus</i> ) <sup>2</sup>       |
|                       | SWS2A $\beta$  | 468            |                                            | 457 ( <i>P. fuscus</i> ) <sup>6</sup>                                                    |
|                       | RH2B           | 476            |                                            | 494 ( <i>P. kallopterus</i> ) <sup>2</sup>                                               |
|                       | RH2A           | 518            |                                            | 516 ( <i>P. kallopterus</i> ) <sup>2</sup>                                               |
|                       | LWS            | 544            |                                            |                                                                                          |

<sup>1</sup>Siebeck et al., 2010, <sup>2</sup>Losey et al., 2003, <sup>3</sup>Hawryshyn et al., 2003, <sup>4</sup>McFarland and Loew, 1994, <sup>5</sup>Loew and Lythgoe, 1978, <sup>6</sup>Cortesi et al., 2015a

**Table 2:** Summary of calculated quantum catch by hypothetical photopigments under all investigated light spectra in *Pomacentrus moluccensis* and *Ostorhinchus cyanosoma*.

| Species               | treatment | Opsin gene                                                                |          |          |          |          |          |          |
|-----------------------|-----------|---------------------------------------------------------------------------|----------|----------|----------|----------|----------|----------|
|                       |           | SWS1                                                                      | SWS2B    | SWS2Aa   | SWS2Ab   | RH2B     | RH2A     | LWS      |
|                       |           | quantum catch (absolute quanta captured in photons/m <sup>2</sup> /sr/nm) |          |          |          |          |          |          |
| <i>P. moluccensis</i> | reef      | 4.27E+12                                                                  | 7.82E+12 |          |          | 1.42E+13 | 1.6E+13  | 1.63E+13 |
|                       | blue      | 4.96E+11                                                                  | 5.57E+12 |          |          | 1.23E+13 | 1.02E+13 | 7.07E+12 |
|                       | green     | 1.89E+11                                                                  | 4.19E+11 |          |          | 6.91E+12 | 1.06E+13 | 9.26E+12 |
|                       | red       | 1.79E+11                                                                  | 2.42E+11 |          |          | 2.53E+11 | 3.61E+11 | 1.28E+12 |
|                       | no filter | 1.22E+13                                                                  | 1.83E+13 |          |          | 2.27E+13 | 2.32E+13 | 2.36E+13 |
|                       | 0.15 ND   | 3.32E+12                                                                  | 4.44E+12 |          |          | 4.34E+12 | 4.59E+12 | 4.8E+12  |
|                       | 0.6 ND    | 6.94E+11                                                                  | 1.66E+12 |          |          | 2.23E+12 | 2.25E+12 | 2.32E+12 |
| <i>O. cyanosoma</i>   | reef      |                                                                           |          | 1.18E+13 | 1.34E+13 | 1.4E+13  | 1.6E+13  | 1.64E+13 |
|                       | blue      |                                                                           |          | 1.16E+13 | 1.23E+13 | 1.23E+13 | 1.02E+13 | 7.91E+12 |
|                       | green     |                                                                           |          | 2.53E+12 | 5.12E+12 | 6.32E+12 | 1.06E+13 | 9.98E+12 |
|                       | red       |                                                                           |          | 2.82E+11 | 2.64E+11 | 2.56E+11 | 3.61E+11 | 8.8E+11  |
|                       | no filter |                                                                           |          | 2.33E+13 | 2.29E+13 | 2.27E+13 | 2.32E+13 | 2.36E+13 |
|                       | 0.15 ND   |                                                                           |          | 4.74E+12 | 4.44E+12 | 4.36E+12 | 4.59E+12 | 4.8E+12  |
|                       | 0.6 ND    |                                                                           |          | 2.34E+12 | 2.28E+12 | 2.24E+12 | 2.25E+12 | 2.32E+12 |

**Table 3:** Summary of Kendall tau-b coefficients for correlation analysis of quantum catch and opsin gene expression under all treatment spectra combined, and colour and intensity treatments analysed separately, in *Pomacentrus moluccensis* and *Ostorhinchus cyanosoma*. After Bonferroni-Correction for three tested hypotheses ( $p = \alpha/m$ , with  $m=3$ ), P-Values less than or equal to 0.017, 0.003, and 0.0003 were considered significant and are marked with \*, \*\*, or \*\*\*, respectively (shown in bold).

| Treatment          | Species               | gene           | kendall tau | p (tau-b)            |
|--------------------|-----------------------|----------------|-------------|----------------------|
| Colour & Intensity | <i>O. cyanosoma</i>   | SWS2A $\alpha$ | 0.32        | <b>&lt;0.0003***</b> |
|                    |                       | SWS2A $\beta$  | -0.266      | <b>&lt;0.003**</b>   |
|                    |                       | RH2B           | 0.177       | 0.029                |
|                    |                       | RH2A           | -0.172      | 0.033                |
|                    |                       | LWS            | 0.14        | 0.085                |
|                    | <i>P. moluccensis</i> | SWS1           | 0.323       | <b>&lt;0.003**</b>   |
|                    |                       | SWS2B          | -0.378      | <b>&lt;0.0003***</b> |
|                    |                       | RH2B           | 0.136       | 0.149                |
|                    |                       | RH2A           | 0.124       | 0.189                |
|                    |                       | LWS            | -0.236      | <b>&lt;0.017*</b>    |
| Colour             | <i>O. cyanosoma</i>   | SWS2A $\alpha$ | 0.443       | <b>&lt;0.0003***</b> |
|                    |                       | SWS2A $\beta$  | -0.443      | <b>&lt;0.0003***</b> |
|                    |                       | RH2B           | 0.297       | <b>&lt;0.003**</b>   |
|                    |                       | RH2A           | -0.288      | <b>&lt;0.017*</b>    |
|                    |                       | LWS            | 0.082       | 0.419                |
|                    | <i>P. moluccensis</i> | SWS1           | 0.49        | <b>&lt;0.0003***</b> |
|                    |                       | SWS2B          | -0.49       | <b>&lt;0.0003***</b> |
|                    |                       | RH2B           | 0.231       | 0.048                |
|                    |                       | RH2A           | 0.269       | 0.022                |
|                    |                       | LWS            | -0.435      | <b>&lt;0.0003***</b> |
| Intensity          | <i>O. cyanosoma</i>   | SWS2A $\alpha$ | -0.023      | 0.86                 |
|                    |                       | SWS2A $\beta$  | 0.023       | 0.86                 |
|                    |                       | RH2B           | -0.017      | 0.9                  |
|                    |                       | RH2A           | 0.017       | 0.9                  |
|                    |                       | LWS            | 0.202       | 0.1                  |
|                    | <i>P. moluccensis</i> | SWS1           | 0.319       | <b>&lt;0.017*</b>    |
|                    |                       | SWS2B          | -0.319      | <b>&lt;0.017*</b>    |
|                    |                       | RH2B           | 0.07        | 0.61                 |
|                    |                       | RH2A           | 0.077       | 0.568                |
|                    |                       | LWS            | -0.004      | 0.99                 |



**Table S1:** Overview of numbers of specimens used per light treatment and per sampling timepoint. Timepoint 0 = Start of experiment; Timepoint 1 = 1 month; Timepoint 2 = 4 months (*O. cyanosoma*) / 6 months (*P. moluccensis*, *P. amboinensis*).

| Species               | Treatment |      |   |       |   |     |   |           |     |        |     |       |     |
|-----------------------|-----------|------|---|-------|---|-----|---|-----------|-----|--------|-----|-------|-----|
|                       | Baseline  | Blue |   | Green |   | Red |   | No Filter |     | ND0.15 |     | ND0.6 |     |
|                       | 0         | 1    | 2 | 1     | 2 | 1   | 2 | 1         | 2   | 1      | 2   | 1     | 2   |
| <i>O. cyanosoma</i>   | 18        | 8    | 8 | 7     | 5 | 8   | 5 | 6         | n/a | 10     | n/a | 7     | n/a |
| <i>P. moluccensis</i> | 18        | 3    | 3 | 3     | 5 | 3   | 9 | 6         | n/a | 6      | n/a | 5     | n/a |
| <i>P. amboinensis</i> | 8         | 5    | 5 | 13    | 5 | 4   | 5 | n/a       | n/a | n/a    | n/a | n/a   | n/a |

**Table S2:** Primer names and sequences used for PCR and sequencing of the pool of opsins for *O. cyanosoma*; and summary of qPCR primer combinations and efficiencies for each species. Primer names and sequences for *P. amboinensis* and *P. moluccensis* were obtained from Stieb et al. (2016).

| opsin                           | species                                                | primer pool                                            | sequence                        |
|---------------------------------|--------------------------------------------------------|--------------------------------------------------------|---------------------------------|
| <b>SWS2A<math>\alpha</math></b> | <i>O. cyanosoma</i>                                    | pSWS2AA_F1                                             | 5'-GCCATGGCTAACCTCATTGT-3'      |
|                                 |                                                        | pSWS2AA_R4                                             | 5'-TTTGGAGACTTCAGTTACTGATGCT-3' |
| <b>SWS2A<math>\beta</math></b>  | <i>O. cyanosoma</i>                                    | pSWS2AB_F3                                             | 5'-AACTTGGCCTTTTCCAACCT-3'      |
|                                 |                                                        | pSWS2AB_R5                                             | 5'-ACTTCAGTCACCGACTGG-3'        |
| <b>RH2B</b>                     | <i>O. cyanosoma</i>                                    | pRH2B_F3                                               | 5'-CTCCGGCAACCTCTGAACCT-3'      |
|                                 |                                                        | pRH2B_R3                                               | 5'-GTATGGGGTCCAAGCAACAA-3'      |
| <b>RH2A</b>                     | <i>O. cyanosoma</i>                                    | pSWS2AB_R5                                             | 5'-GGCAACCGCTGAACTACATC-3'      |
|                                 |                                                        | pRH2A_R1                                               | 5'-AGCCAAAGACCATCAAGACG-3'      |
| <b>LWS</b>                      | <i>O. cyanosoma</i>                                    | pLWS_F1                                                | 5'-TCAGCGTATGCAACCAGTTC-3'      |
|                                 |                                                        | pLWS_R1                                                | 5'-GGCATATCCAGGGTTAGCAG-3'      |
| <b>RH1</b>                      | <i>O. cyanosoma</i>                                    | pRH1_F2                                                | 5'-GCGTTGTCCGGAGTCCTTAT-3'      |
|                                 |                                                        | pRH1_R2                                                | 5'-TCCACATGAGCACTGCATTC-3'      |
| opsin                           | species with primer efficiencies (%)                   | primer qPCR                                            | sequence                        |
| <b>SWS1</b>                     | <i>P. amboinensis</i> (90), <i>P. moluccensis</i> (94) | SWS1_forward_1                                         | 5'-CTCCAAGAGCTCCTGCGTCT-3'      |
|                                 |                                                        | SWS1_reverse_1                                         | 5'-TGATGCAGGCGTTGAACTGTTT-3'    |
| <b>SWS2B</b>                    | <i>P. amboinensis</i> (91), <i>P. moluccensis</i> (91) | SWS2B_forward_1                                        | 5'-GGTGAAAGCGGTAGCAAAGG-3'      |
|                                 |                                                        | SWS2B_reverse_1                                        | 5'-CCATCTTGGTCACCTCCCCTC-3'     |
| <b>SWS2A<math>\alpha</math></b> | <i>O. cyanosoma</i> (103)                              | SWS2AA_F3                                              | 5'-ATAAACAGTTCCGTGGGTGCATGAT-3' |
|                                 |                                                        | SWS2AA_R3                                              | 5'-TTGGAGACTTCAGTTACTGATGCTG-3' |
| <b>SWS2A<math>\beta</math></b>  | <i>O. cyanosoma</i> (100)                              | SWS2AB_F1                                              | 5'-TAACGCTTGGTGGGATGGTGAG-3'    |
|                                 |                                                        | SWS2AB_R1                                              | 5'-GCTAAAGCGTGGTCAGTTTGAAC-3'   |
| <b>RH2B</b>                     | <i>P. amboinensis</i>                                  | RH2B_forward_1                                         | 5'-GGTGGGCTATTTCTCCTTGGG-3'     |
|                                 | <i>P. moluccensis</i>                                  | RH2B_forward_2                                         | 5'-GATGGGCTATTTCTCCTTGGGG-3'    |
|                                 | <i>P. amboinensis</i> (93), <i>P. moluccensis</i> (96) | RH2B_reverse_1                                         | 5'-CACAGAGACTTGACCTCCG-3'       |
|                                 | <i>O. cyanosoma</i> (95)                               | RH2B_F1                                                | 5'-CTGCTTGGCTTACCATCACC-3'      |
| <b>RH2A</b>                     | <i>P. amboinensis</i> (91), <i>P. moluccensis</i> (94) | RH2B_R5                                                | 5'-ACTTGACCTCCCAGTGTAGCCATG-3'  |
|                                 |                                                        | RH2A_forward_1                                         | 5'-CATTCTTGGACCCACTTTCTGCG-3'   |
|                                 | <i>O. cyanosoma</i> (91)                               | RH2A_reverse_1                                         | 5'-CCAGAGAGCAACTTACCTCCA-3'     |
|                                 |                                                        | RH2A_F2                                                | 5'-ATGCAGGAGCTGGAGTTGCTTTC-3'   |
| <b>LWS</b>                      | <i>P. moluccensis</i>                                  | RH2A_R2                                                | 5'-GGTACCTGGACCAGCCACC-3'       |
|                                 |                                                        | LWS_forward_1                                          | 5'-ACACCAATCACACCAAAGATCCC-3'   |
|                                 | <i>P. amboinensis</i>                                  | LWS_forward_3                                          | 5'-CCAATTACACCAAAGATCCC-3'      |
|                                 |                                                        | <i>P. amboinensis</i> (96), <i>P. moluccensis</i> (95) | LWS_reverse_2                   |
| <i>O. cyanosoma</i> (96)        | LWS_F2                                                 | 5'-TTCGGATGGAGCAGGTAAGTGG-3'                           |                                 |
|                                 | LWS_R2                                                 | 5'-ATCATGTACGACTGGACTCCAGG-3'                          |                                 |
| <b>RH1</b>                      | <i>P. amboinensis</i> (91), <i>P. moluccensis</i> (90) | RH1_forward_1                                          | 5'-CCACTGCATGATCACCACCT-3'      |
|                                 |                                                        | RH1_reverse_1                                          | 5'-GATGCTCCCTCCTTCTTCCG-3'      |
|                                 | <i>O. cyanosoma</i> (81)                               | RH1_F3                                                 | 5'-CCATCAGCAACTTCCGCTTGG-3'     |
|                                 |                                                        | RH1_R3                                                 | 5'-GGGGTACGGAGCAAGCAGC-3'       |

**Table S3:** Summary of total relative opsin expression under different colour treatments and after different treatment durations in the three investigated reef fish species. Values are given as median fraction of total single cone opsin (%) and interquartile range for each of the SWS cone opsins present in each respective species (*O. cyanosoma*: SWS2A $\alpha$ , SWS2A $\beta$ ; *P. amboinensis*/*P. moluccensis*: SWS1/SWS2B), as median fraction of total double cone opsin (RH2B, RH2A, LWS) and interquartile range, and as median fraction of cone and rod opsin of total opsin (%) and interquartile range.

| Species               | time spent in tank [months] | treatment | n        | Opsin gene |            |                |               |            |            |           |            |            |            |
|-----------------------|-----------------------------|-----------|----------|------------|------------|----------------|---------------|------------|------------|-----------|------------|------------|------------|
|                       |                             |           |          | SWS1       | SWS2B      | SWS2A $\alpha$ | SWS2A $\beta$ | RH2B       | RH2A       | LWS       | Total Cone | Total RH1  |            |
| <i>P. amboinensis</i> | 0                           | baseline  | 8        | 86.6, 9.6  | 13.4, 9.6  | -              | -             | 45.0, 4.0  | 54.5, 3.9  | 0.4, 0.4  | 58.7, 6.5  | 41.3, 6.5  |            |
|                       | 1                           | blue      | 5        | 84.2, 6.1  | 15.8, 6.1  | -              | -             | 45.4, 2.4  | 53.4, 1.6  | 1.3, 0.2  | 64.4, 3.1  | 35.6, 3.1  |            |
|                       |                             | green     | 13       | 68.4, 4.1  | 31.6, 4.1  | -              | -             | 46.6, 5.4  | 46.6, 6.6  | 1.1, 4.9  | 63.9, 7.5  | 36.1, 7.5  |            |
|                       |                             | red       | 4        | 68.8, 13.2 | 31.2, 13.2 | -              | -             | 46.0, 2.6  | 52.8, 1.8  | 1.1, 0.4  | 63.2, 4.5  | 36.8, 4.5  |            |
|                       | 6                           | blue      | 5        | 75.7, 3.5  | 24.3, 3.5  | -              | -             | 45.6, 1.0  | 53.9, 0.9  | 0.5, 0.4  | 52.9, 6.1  | 47.1, 6.1  |            |
|                       |                             | green     | 5        | 58.8, 12.9 | 41.2, 12.9 | -              | -             | 44.5, 4.4  | 54.5, 5.0  | 0.6, 0.6  | 56.3, 9.1  | 43.7, 9.1  |            |
|                       |                             | red       | 5        | 45.8, 12.2 | 54.2, 12.2 | -              | -             | 45.3, 1.7  | 54.2, 1.0  | 0.6, 0.2  | 47.6, 7.9  | 52.4, 7.9  |            |
|                       | <i>P. moluccensis</i>       | 0         | baseline | 18         | 85.0, 12.5 | 15.0, 12.5     | -             | -          | 43.4, 3.1  | 52.2, 2.7 | 3.6, 2.1   | 63.2, 11.0 | 46.8, 11.0 |
|                       |                             | 1         | blue     | 3          | 87.8, 12.4 | 12.2, 12.4     | -             | -          | 44.3, 1.5  | 49.6, 1.4 | 6.6, 2.6   | 62.6, 1.8  | 37.4, 1.8  |
| green                 |                             |           | 3        | 56.1, 8.9  | 43.9, 8.9  | -              | -             | 40.6, 2.0  | 50.8, 0.8  | 8.7, 2.7  | 58.3, 2.2  | 41.7, 2.2  |            |
| red                   |                             |           | 3        | 57.3, 6.2  | 42.7, 6.2  | -              | -             | 41.7, 4.0  | 51.3, 3.9  | 5.1, 1.0  | 56.6, 5.3  | 33.4, 5.3  |            |
| no filter             |                             |           | 6        | 69.1, 21.9 | 30.9, 21.9 | -              | -             | 45.5, 2.1  | 49.0, 2.6  | 6.3, 2.2  | 65.7, 15.5 | 34.3, 15.5 |            |
| 0.15 ND               |                             |           | 6        | 69.8, 14.4 | 30.2, 14.4 | -              | -             | 47.0, 2.4  | 48.4, 2.6  | 5.5, 4.0  | 55.1, 8.2  | 44.9, 8.2  |            |
| 0.6 ND                |                             |           | 5        | 55.5, 5.2  | 44.5, 5.2  | -              | -             | 44.2, 2.0  | 50.1, 1.2  | 6.1, 3.3  | 61.3, 0.7  | 38.7, 0.7  |            |
| 6                     |                             | blue      | 3        | 70.3, 5.9  | 29.7, 5.9  | -              | -             | 43.5, 1.0  | 49.8, 1.3  | 5.0, 1.3  | 51.0, 11.4 | 49.0, 11.4 |            |
|                       |                             | green     | 5        | 59.6, 14.3 | 40.4, 14.3 | -              | -             | 41.5, 0.9  | 52.4, 0.3  | 6.1, 1.0  | 53.1, 3.3  | 46.9, 3.3  |            |
|                       |                             | red       | 9        | 66.6, 25.9 | 33.4, 25.9 | -              | -             | 41.5, 3.6  | 49.9, 4.4  | 6.0, 2.6  | 62.3, 12.1 | 37.7, 12.1 |            |
| <i>O. cyanosoma</i>   |                             | 0         | baseline | 18         | -          | -              | 9.4, 7.5      | 90.6, 7.5  | 17.1, 8.5  | 82.5, 8.6 | 0.4, 0.9   | 91.2, 3.9  | 8.8, 3.9   |
|                       |                             | 1         | blue     | 8          | -          | -              | 9.4, 5.5      | 90.6, 5.5  | 16.5, 8.9  | 83.0, 8.5 | 0.7, 0.5   | 92.8, 0.8  | 7.2, 0.8   |
|                       | green                       |           | 7        | -          | -          | 6.2, 5.7       | 93.8, 5.7     | 14.5, 2.9  | 84.6, 4.1  | 0.8, 0.7  | 93.4, 1.3  | 6.6, 1.3   |            |
|                       | red                         |           | 8        | -          | -          | 2.3, 2.4       | 97.7, 2.4     | 13.1, 5.1  | 86.6, 5.1  | 0.4, 0.2  | 92.9, 1.6  | 7.1, 1.6   |            |
|                       | no filter                   |           | 6        | -          | -          | 16.6, 2.1      | 83.4, 2.1     | 33.4, 10.0 | 65.9, 9.4  | 0.5, 0.6  | 89.9, 3.3  | 10.1, 3.3  |            |
|                       | 0.15 ND                     |           | 10       | -          | -          | 16.7, 17.9     | 83.3, 17.9    | 20.5, 12.5 | 78.6, 11.3 | 0.4, 1.0  | 91.3, 1.3  | 8.7, 1.3   |            |
|                       | 0.6 ND                      |           | 7        | -          | -          | 13.9, 9.3      | 86.1, 9.3     | 42.0, 20.0 | 57.9, 19.7 | 0.1, 0.3  | 91.1, 5.6  | 8.9, 5.6   |            |
|                       | 4                           | blue      | 8        | -          | -          | 11.3, 5.6      | 88.7, 5.6     | 4.1, 5.6   | 94.3, 6.6  | 1.5, 1.7  | 94.9, 1.5  | 5.1, 1.5   |            |
|                       |                             | green     | 5        | -          | -          | 9.0, 6.4       | 91.0, 6.4     | 6.1, 6.2   | 92.2, 7.2  | 1.2, 0.5  | 95.5, 0.3  | 3.5, 0.3   |            |
|                       |                             | red       | 5        | -          | -          | 3.3, 1.7       | 96.7, 1.7     | 3.3, 3.9   | 95.4, 3.4  | 0.6, 0.5  | 94.8, 1.1  | 5.2, 1.1   |            |

**Table S4:** Summary of beta regression models showing results for baseline datasets tested against light treatments (blue, green, red, no filter, ND0.15, ND0.6) after different time points, and results for no filter datasets tested against light treatments (blue, green, red, ND0.15, ND0.6). After Bonferroni-Correction for six (baseline dataset) respectively five (no filter dataset) tested treatment hypotheses ( $p = \alpha/m$ , with  $m=6$  resp. 5),  $p$ -values less than or equal to 0.0083, 0.0017, and 0.00017 resp.  $p$ -values less than or equal to 0.01, 0.002, and 0.0002 were considered significant and are marked with \*, \*\*, or \*\*\*, respectively. Statistically significant  $P$ -values are shown in bold.

| species               | time spent in tank [months] | light & control treatment | opsin gene         |                    |                    |                    |                    |                    |                    |                    |       |
|-----------------------|-----------------------------|---------------------------|--------------------|--------------------|--------------------|--------------------|--------------------|--------------------|--------------------|--------------------|-------|
|                       |                             |                           | SWS1               | SWS2B              | SWS2A $\alpha$     | SWS2A $\beta$      | RH2B               | RH2A               | LWS                | RH1                |       |
|                       |                             |                           | baseline           | baseline           | baseline           | baseline           | baseline           | baseline           | baseline           | baseline           |       |
| <i>P. amboinensis</i> | 1                           | blue                      | 0.385              | 0.385              | n/a                | n/a                | 0.508              | 0.865              | <b>0.002*</b>      | 0.337              |       |
|                       |                             | green                     | <b>2.77E-08***</b> | <b>2.77E-08***</b> | n/a                | n/a                | 0.09               | <b>0.004*</b>      | <b>0.007*</b>      | 0.277              |       |
|                       |                             | red                       | <b>7.02E-05***</b> | <b>7.02E-05***</b> | n/a                | n/a                | 0.404              | 0.245              | 0.009              | 0.194              |       |
|                       | 6                           | blue                      | <b>1.05E-04***</b> | <b>1.05E-04***</b> | n/a                | n/a                | 0.922              | 0.982              | 0.169              | 0.071              |       |
|                       |                             | green                     | <b>1.01E-14***</b> | <b>1.01E-14***</b> | n/a                | n/a                | 0.78               | 0.676              | 0.046              | 0.091              |       |
|                       |                             | red                       | <b>2.67E-13***</b> | <b>2.67E-13***</b> | n/a                | n/a                | 0.697              | 0.823              | 0.999              | 0.015              |       |
| <i>P. moluccensis</i> | 1                           | blue                      | 0.947              | 0.947              | n/a                | n/a                | 0.465              | 0.16               | 0.715              | 0.683              |       |
|                       |                             | green                     | <b>1.85E-05***</b> | <b>1.85E-05***</b> | n/a                | n/a                | 0.108              | 0.452              | <b>2.23E-04**</b>  | 0.222              |       |
|                       |                             | red                       | <b>5.83E-06***</b> | <b>5.83E-06***</b> | n/a                | n/a                | 0.902              | 0.22               | 0.009              | 0.126              |       |
|                       |                             | no filter                 | <b>7.65E-04**</b>  | <b>7.65E-04**</b>  | n/a                | n/a                | 0.09               | <b>7.68E-04**</b>  | <b>0.002*</b>      | 0.349              |       |
|                       |                             | 0.15 ND                   | <b>4.00E-05***</b> | <b>4.00E-05***</b> | n/a                | n/a                | 0.019              | <b>6.13E-04**</b>  | 0.13               | 0.044              |       |
|                       |                             | 0.6 ND                    | <b>3.5E-10***</b>  | <b>3.5E-10***</b>  | n/a                | n/a                | 0.414              | 0.051              | 0.05               | 0.257              |       |
|                       | 6                           | blue                      | 0.01               | 0.01               | n/a                | n/a                | 0.863              | 0.151              | <b>0.008*</b>      | 0.076              |       |
|                       |                             | green                     | <b>4.96E-09***</b> | <b>4.96E-09***</b> | n/a                | n/a                | 0.235              | 0.849              | <b>0.006*</b>      | <b>7.38E-05***</b> |       |
|                       |                             | red                       | <b>3.64E-04**</b>  | <b>3.64E-04**</b>  | n/a                | n/a                | 0.14               | 0.12               | <b>8.25E-08***</b> | 0.058              |       |
|                       | <i>O. cyanosoma</i>         | 1                         | blue               | n/a                | n/a                | 0.521              | 0.521              | 0.63               | 0.602              | 0.357              | 0.204 |
|                       |                             |                           | green              | n/a                | n/a                | 0.109              | 0.109              | 0.204              | 0.213              | 0.145              | 0.076 |
|                       |                             |                           | red                | n/a                | n/a                | <b>1.74E-05***</b> | <b>1.74E-05***</b> | 0.184              | 0.134              | 0.527              | 0.416 |
| no filter             |                             |                           | n/a                | n/a                | <b>0.003*</b>      | <b>0.003*</b>      | <b>1.01E-04***</b> | <b>9.68E-05***</b> | 0.75               | 0.417              |       |
| 0.15 ND               |                             |                           | n/a                | n/a                | <b>0.002*</b>      | <b>0.002*</b>      | 0.627              | 0.609              | 0.834              | 0.707              |       |
| 0.6 ND                |                             |                           | n/a                | n/a                | 0.343              | 0.343              | <b>0.003*</b>      | <b>0.003*</b>      | <b>0.001*</b>      | 0.156              |       |
| 4                     |                             | blue                      | n/a                | n/a                | 0.227              | 0.227              | <b>2.41E-04**</b>  | <b>7.62E-04**</b>  | 0.029              | 0.015              |       |
|                       |                             | green                     | n/a                | n/a                | 0.736              | 0.736              | <b>0.002*</b>      | <b>0.002*</b>      | 0.029              | 0.011              |       |
|                       |                             | red                       | n/a                | n/a                | <b>2.01E-04**</b>  | <b>2.01E-04**</b>  | <b>3.43E-05***</b> | <b>2.73E-05***</b> | 0.836              | 0.013              |       |
|                       |                             |                           | <b>no filter</b>   | <b>no filter</b>   | <b>no filter</b>   | <b>no filter</b>   | <b>no filter</b>   | <b>no filter</b>   | <b>no filter</b>   |                    |       |
| <i>P. moluccensis</i> | 1                           | blue                      | 0.046              | 0.046              | n/a                | n/a                | 0.514              | 0.18               | 0.306              |                    |       |
|                       |                             | green                     | 0.183              | 0.183              | n/a                | n/a                | <b>0.002*</b>      | 0.03               | 0.349              |                    |       |
|                       |                             | red                       | 0.121              | 0.121              | n/a                | n/a                | 0.365              | 0.304              | 0.995              |                    |       |
|                       |                             | 0.15 ND                   | 0.606              | 0.606              | n/a                | n/a                | 0.435              | 0.528              | 0.477              |                    |       |
|                       |                             | 0.6 ND                    | 0.011              | 0.011              | n/a                | n/a                | 0.323              | 0.259              | 0.591              |                    |       |
| <i>O. cyanosoma</i>   | 1                           | blue                      | n/a                | n/a                | <b>5.44E-04**</b>  | <b>5.44E-04**</b>  | <b>1.25E-08***</b> | <b>9.86E-09***</b> | 0.147              |                    |       |
|                       |                             | green                     | n/a                | n/a                | <b>3.34E-06***</b> | <b>3.34E-06***</b> | <b>6.49E-09***</b> | <b>8.03E-09***</b> | 0.061              |                    |       |
|                       |                             | red                       | n/a                | n/a                | <b>2.97E-14***</b> | <b>2.97E-14***</b> | <b>4.52E-12***</b> | <b>7.63E-13***</b> | 0.748              |                    |       |
|                       |                             | 0.15 ND                   | n/a                | n/a                | <b>0.004*</b>      | <b>0.004*</b>      | <b>5.7E-04**</b>   | <b>3.44E-04**</b>  | 0.895              |                    |       |
|                       |                             | 0.6 ND                    | n/a                | n/a                | 0.178              | 0.178              | 0.782              | 0.751              | 0.037              |                    |       |



## Supplementary literature cited

- Chan, T., Lee, M. and Sakmar, T. P.** (1992). Introduction of hydroxyl-bearing amino acids causes bathochromic spectral shifts in rhodopsin. Amino acid substitutions responsible for red-green color pigment spectral tuning. *J. Biol. Chem.* **267**, 9478–9480.
- Cortesi, F., Musilová, Z., Stieb, S. M., Hart, N. S., Siebeck, U. E., Malmstrøm, M., Tørresen, O. K., Jentoft, S., Cheney, K. L., Marshall, N. J., et al.** (2015). Ancestral duplications and highly dynamic opsin gene evolution in percomorph fishes. *Proc. Natl. Acad. Sci. U. S. A.* **112**, 1493–8.
- Dungan, S. Z., Kosyakov, A. and Chang, B. S. W.** (2016). Spectral tuning of killer whale (*Orcinus orca*) rhodopsin: Evidence for positive selection and functional adaptation in a cetacean visual pigment. *Mol. Biol. Evol.* **33**, 323–336.
- Lin, S. W., Kochendoerfer, G. G., Carroll, K. S., Wang, D., Mathies, R. A. and Sakmar, T. P.** (1998). Mechanisms of spectral tuning in blue cone visual pigments. Visible and raman spectroscopy of blue-shifted rhodopsin mutants. *J. Biol. Chem.* **273**, 24583–91.
- Losey, G. S., McFarland, W. N., Loew, E. R., Zamzow, J. P., Nelson, P. A. and Marshall, N. J.** (2003). Visual Biology of Hawaiian Coral Reef Fishes. I. Ocular Transmission and Visual Pigments.
- Spady, T. C., Parry, J. W. L., Robinson, P. R., Hunt, D. M., Bowmaker, J. K. and Carleton, K. L.** (2006). Evolution of the cichlid visual palette through ontogenetic subfunctionalization of the opsin gene arrays. *Mol. Biol. Evol.* **23**, 1538–47.
- Siebeck, U. E., Parker, A. N., Sprenger, D., Mäthger, L. M. and Wallis, G.** (2010). A species of reef fish that uses ultraviolet patterns for covert face recognition. *Curr. Biol.* **20**, 407–410.
- Stieb, S. M., Carleton, K. L., Cortesi, F., Marshall, N. J. and Salzburger, W.** (2016). Depth-dependent plasticity in opsin gene expression varies between damselfish (Pomacentridae) species. *Mol. Ecol.* **25**, 3645–3661.
- Takahashi, Y. and Ebrey, T. G.** (2003). Molecular basis of spectral tuning in the newt short wavelength sensitive visual pigment. *Biochemistry* **42**, 6025–6034.
- Wilkie, S. E., Robinson, P. R., Cronin, T. W., Poopalasundaram, S., Bowmaker, J. K. and Hunt, D. M.** (2000). Spectral tuning of avian violet- and ultraviolet-sensitive visual pigments. *Biochemistry* **39**, 7895–7901.
- Yokoyama, S.** (2008). Evolution of dim-light and color vision pigments. *Annu. Rev. Genomics Hum. Genet.* **9**, 259–82.
